# Supplementary material for: The Optimal Dose, Efficacy and Safety of Tranexamic Acid and Epsilon‐Aminocaproic Acid to Reduce Bleeding in TKA: A Systematic Review and Bayesian Network Meta‐analysis
Source: PubMed Central journal article supplement — Orthop Surg. 2023 Mar 6;15(4):930–46. doi: 10.1111/os.13678 (PMC10102320; doi:10.1111/os.13678), 2023-03-06

Table S 1. Detailed information about included studies.

| Author/Year     | Surgery | Regimen and total dosage                    |             |         | Number of patients |       |         | Gender (F/M)                   |              |         | Age                      |           |         | BMI                      |      |         |
|-----------------|---------|---------------------------------------------|-------------|---------|--------------------|-------|---------|--------------------------------|--------------|---------|--------------------------|-----------|---------|--------------------------|------|---------|
|                 |         | TXA                                         | EACA        | Placebo | TXA                | EACA  | Placebo | TXA                            | EACA         | Placebo | TXA                      | EACA      | Placebo | TXA                      | EACA | Placebo |
| Camarasa 2006   | uTKA    | 20mg/kg IV                                  | 150mg/kg IV | Placebo | 35                 | 32    | 60      | 26/9                           | 28/4         | 48/12   | 73                       | 73        | 72      |                          |      |         |
| Orpen 2005      | uTKA    | 15mg/kg IV                                  |             | Placebo | 15                 |       | 14      | 7/8                            |              | 11/3    | 73                       |           | 69      |                          |      |         |
| Wong 2010       | uTKA    | 1.5g IA; 3.0g IA                            |             | Placebo | 31/33              |       | 35      | 25/6; 19/14                    |              | 22/13   | 67/63.9                  |           | 68.4    | 31.3/30.6                |      | 32.7    |
| Rajesh 2012     | uTKA    | 10mg/kg IV; 20mg/kg IV; 30mg/kg IV; 3.0g IA |             | Placebo | 40/40/40/40/40     |       | 40      | 30/10; 29/11; 32/8; 33/7; 34/6 |              | 36/4    | 67.3/68.3/67.4/66.8/67.4 |           | 66.2    | 29.4/28.6/27.8/31.2/30.9 |      | 30.8    |
| Shuvendu 2012   | uTKA    | 0.5g IA                                     |             | Placebo | 25                 |       | 25      | 15/10                          |              | 16/9    | 66.04                    |           | 66.56   | 27.1                     |      | 26.8    |
| Georgiadis 2013 | uTKA    | 2.0g IA                                     |             | Placebo | 50                 |       | 51      | 31/19                          |              | 39/12   | 67                       |           | 64.5    | 33.9                     |      | 34.2    |
| Iwai 2013*      | uTKA    | 1.0g IV; 2.0g IV                            |             | Placebo | 21/26              |       | 31      |                                |              |         | 74.7/75                  |           | 73.7    | 26.2/26.0                |      | 28.1    |
| Paphon 2013     | uTKA    | 0.5g IA                                     |             | Placebo | 45                 |       | 45      | 40/5                           |              | 43/2    | 68.1                     |           | 66.2    | 27.3                     |      | 26.3    |
| Seo 2013        | uTKA    | 1.5g IA; 1.5g IV                            |             | Placebo | 50/50              |       | 50      | 45/5; 44/6                     |              | 45/5    | 67.5/66.8                |           | 67.8    | 27.8/28.1                |      | 27.9    |
| Aguilera 2014   | uTKA    | 1.0g IA; 2.0g IV                            |             | Placebo | 50/50              |       | 50      | 32/18; 38/12                   |              | 32/18   | 72.53/72.49              |           | 73.68   | 30.9/30.2                |      | 30.1    |
| Lin 2014        | uTKA    | 1.0g IA                                     |             | Placebo | 40                 |       | 40      | 33/7                           |              | 35/5    | 71                       |           | 69.7    | 28.9                     |      | 24.5    |
| Wang 2015       | uTKA    | 0.5g IA                                     |             | Placebo | 30                 |       | 30      | 21/9                           |              | 24/6    | 64.9                     |           | 64.97   | 27.8                     |      | 28.3    |
| Akgül 2016*     | uTKA    | 20mg/kg IV                                  |             | Placebo | 35                 |       | 35      |                                |              |         |                          |           |         |                          |      |         |
| Tzatzairis 2016 | uTKA    | 1.0g IA; 1.0g IV                            |             | Placebo | 40/40              |       | 40      | 31/9; 33/7                     |              | 31/9    | 69.55/69.1               |           | 68.58   | 32.6/32.6                |      | 31.6    |
| Boese 2017      | uTKA    | 2.0g IV                                     | 14.0 IV     |         | 95                 | 92    |         | 69/26                          | 71/21        |         | 64.97                    | 66.12     |         | 35.5                     |      | 34.7    |
| Churehill 2016* | uTKA    | 1.0g IV                                     | 10.0g IV    | Placebo | 610                | 820   | 1492    | 392/218                        | 527/293      | 956/536 | 65.8                     | 63.9      | 63.9    |                          |      |         |
| Song 2016       | uTKA    | 1.5g IA; 30mg/kg IV                         |             | Placebo | 50/50              |       | 50      | 44/6; 42/8                     |              | 43/7    | 69.2/69.8                |           | 70.2    | 26.5/26.9                |      | 27.9    |
| Stowers 2017    | uTKA    | 1.5g IA; 1.5g IV                            |             | Placebo | 60/51              |       | 23      | 32/28; 24/27                   |              | 19/4    | 70/71                    |           | 70      | 31.2/31.2                |      | 32.3    |
| Sun 2016        | uTKA    | 30mg/kg IV; 30mg/kg IV; 30mg/kg IV          |             | Placebo | 45/45/45           |       | 45      | 32/12; 28/17; 35/10            |              | 37/8    | 67.2/67.3/68.1           |           | 67.4    | 25.8/26.2/26.1           |      | 25.9    |
| Ugudu 2016      | uTKA    | 3.0g IA; 20mg/kg IV                         |             | Placebo | 42/40              |       | 41      | 33/9; 29/11                    |              | 35/6    | 69.4/70.6                |           | 66.4    | 30.8/31.1                |      | 30.2    |
| Wang 2017       | uTKA    | 1.0g IA; 1.0g IV                            |             | Placebo | 50/50              |       | 50      | 36/14; 36/14                   |              | 34/16   | 67.42/67.98              |           | 67.66   | 26.7/25.9                |      | 26.74   |
| Yen 2017        | uTKA    | 3.0g IA; 1.0g IV                            |             | Placebo | 32/31              |       | 30      | 19/13; 27/4                    |              | 24/6    | 69.13/69.66              |           | 70.87   | 28.1/28.4                |      | 28.26   |
| Yuan 2017       | uTKA    | 3.0g IA                                     |             | Placebo | 140                |       | 140     | 77/63                          |              | 75/65   | 63.26                    |           | 64.63   | 22.87                    |      | 22.68   |
| Arslan 2018     | uTKA    | 1.5g IA                                     |             | Placebo | 50                 |       | 50      |                                |              |         | 66.1                     |           | 68.5    | 30                       |      | 30.4    |
| Liu 2017        | uTKA    | 10mg/kg IV; 15mg/kg IV                      |             | Placebo | 75/75              |       | 74      | 41/34; 45/30                   |              | 43/31   | 63.55/62.97              |           | 61.85   | 26.59/25.98              |      | 26.2    |
| Hualda 2017     | uTKA    | 1.0g IA; 1.0g IV                            |             | Placebo | 30/30              |       | 30      | 19/11; 24/6                    |              | 19/11   | 72.9/73.1                |           | 72.4    |                          |      |         |
| Bradley 2019    | uTKA    | 2.0g IV                                     | 5.0g IV     |         | 73                 | 72    |         | 50/23                          | 42/30        |         | 64.7                     | 65.6      |         | 31.5                     | 31.9 |         |
| Tile 2019*      | uTKA    | 2.0g IA                                     |             | Placebo | 101                |       | 101     | 56/45                          |              | 65/36   | 69.4                     |           | 68.2    | 31.4                     |      | 31.8    |
| Zhang 2019      | uTKA    | 6.0g IV; 20mg/kg IV                         |             | Placebo | 59/57              |       | 59      | 51/8; 47/10                    |              | 48/11   | 66.54/65.21              |           | 64.78   | 25.91/26.2               |      | 25.32   |
| Kim 2020        | uTKA    | 0.5g IA; 1.0g IA; 2.0g IA; 3.0g IA          |             | Placebo | 63/64/63/64        |       | 64      | 57/6; 59/5; 58/5; 56/8         |              | 58/6    | 68.3/71.1/69.9/67.5      |           | 67.2    | 27.4/27.6/28.5/27.2      |      | 26.9    |
| Xue 2021        | uTKA    | 15mg/kg IV; 30mg/kg IV                      |             | Placebo | 53/50              |       | 53      | 40/13; 39/11                   |              | 39/11   | 66.9/66.1                |           | 67      | 26.6                     |      | 27.1    |
| Guerreiro 2021  | uTKA    | 1.0g IA                                     | 4.0g IA     |         | 30                 | 30    |         | 22/8                           | 20/10        |         | 67.97/68.67              |           |         |                          |      |         |
| Lei 2021*       | uTKA    | 15mg/kg IV                                  |             | Placebo | 248                |       | 157     | 206/42                         |              | 138/19  | 58.48                    |           | 56.96   | 23.9                     |      | 24.1    |
| Magi 2021       | uTKA    | 1.0g IV                                     |             | Placebo | 243                |       | 68      | 148/95                         |              | 39/29   | 68.8                     |           | 67.6    | 32.7                     |      | 33.3    |
| Harper 2017*    | uTKA    | 5.0g IA; 5.0g IA                            |             | Placebo |                    | 80/80 | 80      |                                | 41/39; 45/35 | 44/36   |                          | 65.2/66.0 | 64.2    | 31.5/30.1                |      | 30.6    |
| Hobbs 2017*     | uTKA    | 10.0g IV                                    |             | Placebo |                    | 116   | 128     |                                |              |         |                          | 62.1      | 63.1    |                          |      |         |
| Lum 2018*       | uTKA    | 1.0g IV                                     | 5.0g IA     | Placebo | 204                | 183   | 177     | 105/99                         | 99/84        | 106/71  | 65                       | 62.7      | 61.9    | 30                       | 30.2 | 30.2    |
| Churchill 2016* | uTKA    | 10.0g IV                                    |             | Placebo |                    | 25    | 25      |                                | 21/4         | 15/10   |                          | 65.2      | 66.6    |                          | 33.5 | 31.1    |

uTKA, unilateral total knee arthroplasty; IA, intra-articular; IV, intravenous; TXA, tranexamic acid; EACA, epsilon-aminocaproic acid; F/M, female/male; \*, non-RCTs.

|                 |   |   |   |   |   |   |   |
|-----------------|---|---|---|---|---|---|---|
| Aguilera 2014   | ? | + | + | + | + | + | ? |
| Arslan 2018     | + | ? | + | + | + | + | ? |
| Boese 2017      | + | + | + | + | + | + | ? |
| Bradley 2019    | + | - | + | ? | + | + | ? |
| Camarasa 2006   | + | + | + | + | + | + | ? |
| Georgiadis 2013 | + | + | + | + | + | + | ? |
| Guerreiro 2021  | + | + | + | + | + | + | ? |
| Hualda 2017     | + | ? | ? | ? | + | + | ? |
| Kim 2020        | + | ? | + | + | + | + | ? |
| Lin 2014        | + | - | ? | ? | + | + | ? |
| Liu 2017        | + | ? | ? | ? | + | + | ? |
| Magill 2021     | + | - | ? | ? | + | + | ? |
| Orpen 2005      | ? | + | + | + | + | ? | ? |
| Paphon 2013     | + | + | + | + | + | + | ? |
| Rajesh 2012     | + | + | + | + | + | + | ? |
| Seo 2013        | + | + | ? | ? | + | + | ? |
| Shwendu 2012    | + | - | + | + | + | + | ? |
| Song 2016       | + | + | + | + | + | + | ? |
| Stowers 2017    | + | + | + | + | + | + | + |
| Sun 2016        | + | ? | ? | ? | + | + | ? |
| Tzatzaris 2016  | + | ? | ? | ? | + | + | ? |
| Ugurlu 2016     | + | ? | ? | ? | + | + | ? |
| Wang 2015       | + | + | + | + | + | + | ? |
| Wang 2017       | + | + | + | + | + | + | + |
| Wong 2010       | + | + | + | + | + | + | ? |
| Xue 2021        | + | + | + | + | + | + | ? |
| Yen 2017        | + | + | + | + | + | + | ? |
| Yuan 2017       | + | ? | + | + | + | + | ? |
| Zhang 2019      | + | + | + | + | + | + | ? |

Random sequence generation (selection bias)  
Allocation concealment (selection bias)  
Blinding of participants and personnel (performance bias)  
Blinding of outcome assessment (detection bias)  
Incomplete outcome data (attrition bias)  
Selective reporting (reporting bias)  
Other bias

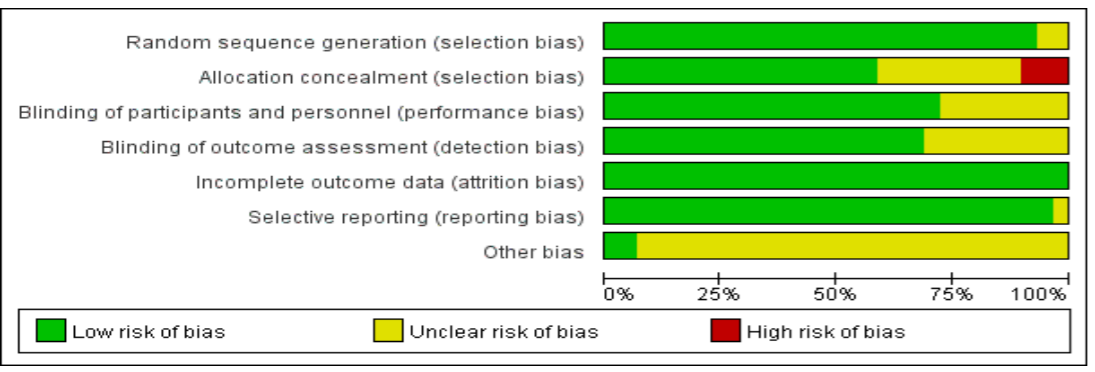

Supplement: OS-15-930-s003.pdf [file OS-15-930-s003.pdf]
