# Supplementary material for: The Optimal Dose, Efficacy and Safety of Tranexamic Acid and Epsilon‐Aminocaproic Acid to Reduce Bleeding in TKA: A Systematic Review and Bayesian Network Meta‐analysis
Source: PubMed Central journal article supplement — Orthop Surg. 2023 Mar 6;15(4):930–46. doi: 10.1111/os.13678 (PMC10102320; doi:10.1111/os.13678), 2023-03-06
Supplement: OS-15-930-s001.pdf [file OS-15-930-s001.pdf]

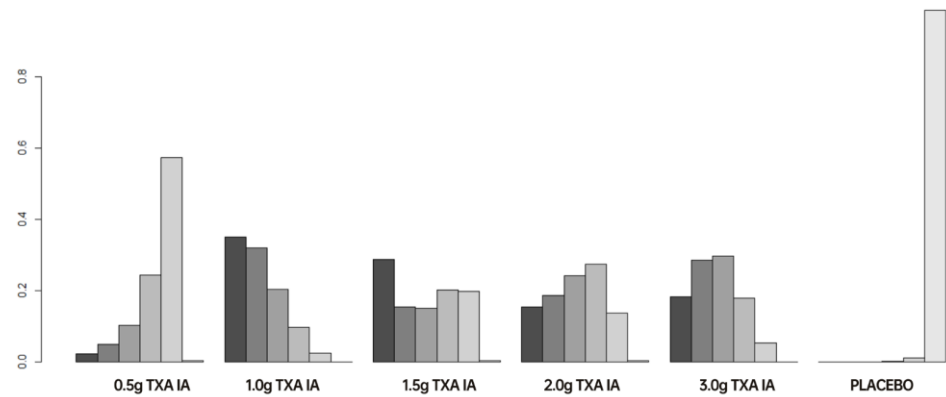

**A. Rank of probability between intra-articular administrations for drainage volume after TKA**

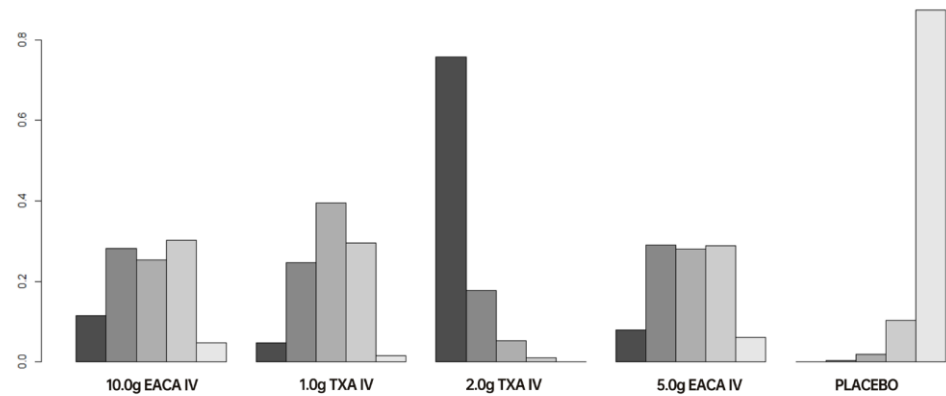

**B. Rank of probability between intravenous (g) administrations for drainage volume after TKA**

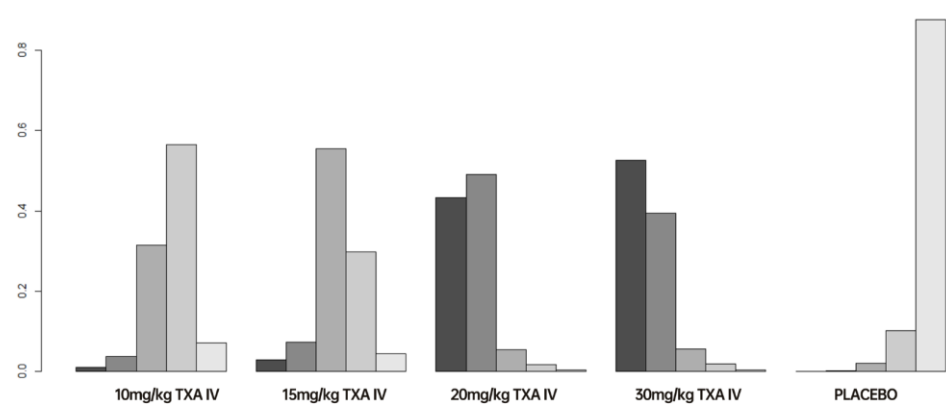

**C. Rank of probability between intravenous (mg/kg) administrations for drainage volume after TKA**

Supplementary figure. Rank of probability for drainage volume after TKA

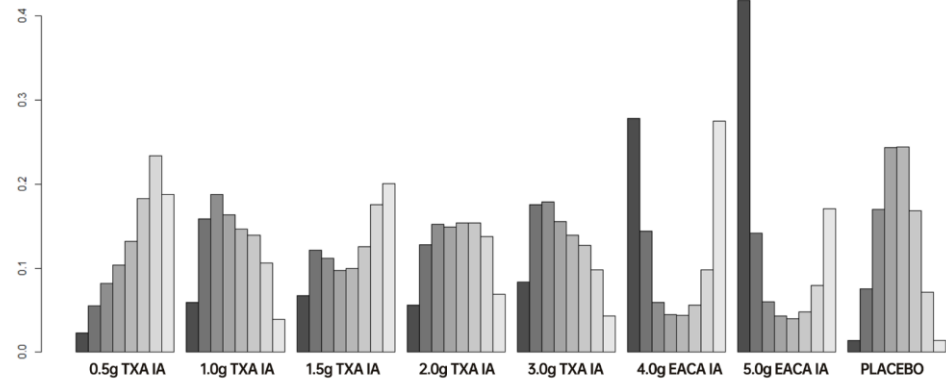

**A. Rank of probability between intra-articular administrations for DVT/PE rates after TKA**

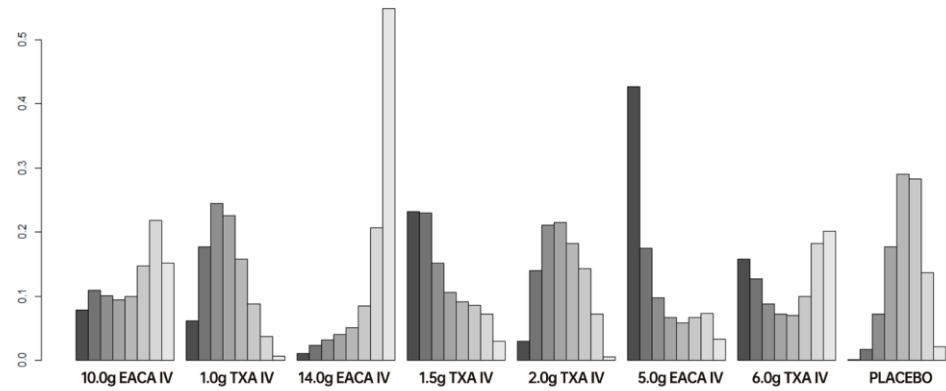

**B. Rank of probability between intravenous (g) administrations for DVT/PE rates after TKA**

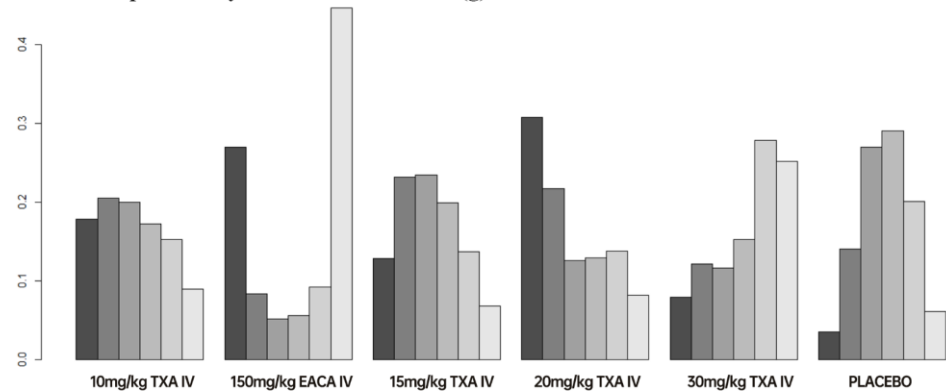

**C. Rank of probability between intravenous (mg/kg) administrations for DVT/PE rates after TKA**

**Supplementary figure. Rank of probability for DVT/PE rates after TKA**
