# Supplementary material for: The Optimal Dose, Efficacy and Safety of Tranexamic Acid and Epsilon‐Aminocaproic Acid to Reduce Bleeding in TKA: A Systematic Review and Bayesian Network Meta‐analysis
Source: PubMed Central journal article supplement — Orthop Surg. 2023 Mar 6;15(4):930–46. doi: 10.1111/os.13678 (PMC10102320; doi:10.1111/os.13678), 2023-03-06
Supplement: OS-15-930-s004.pdf [file OS-15-930-s004.pdf]

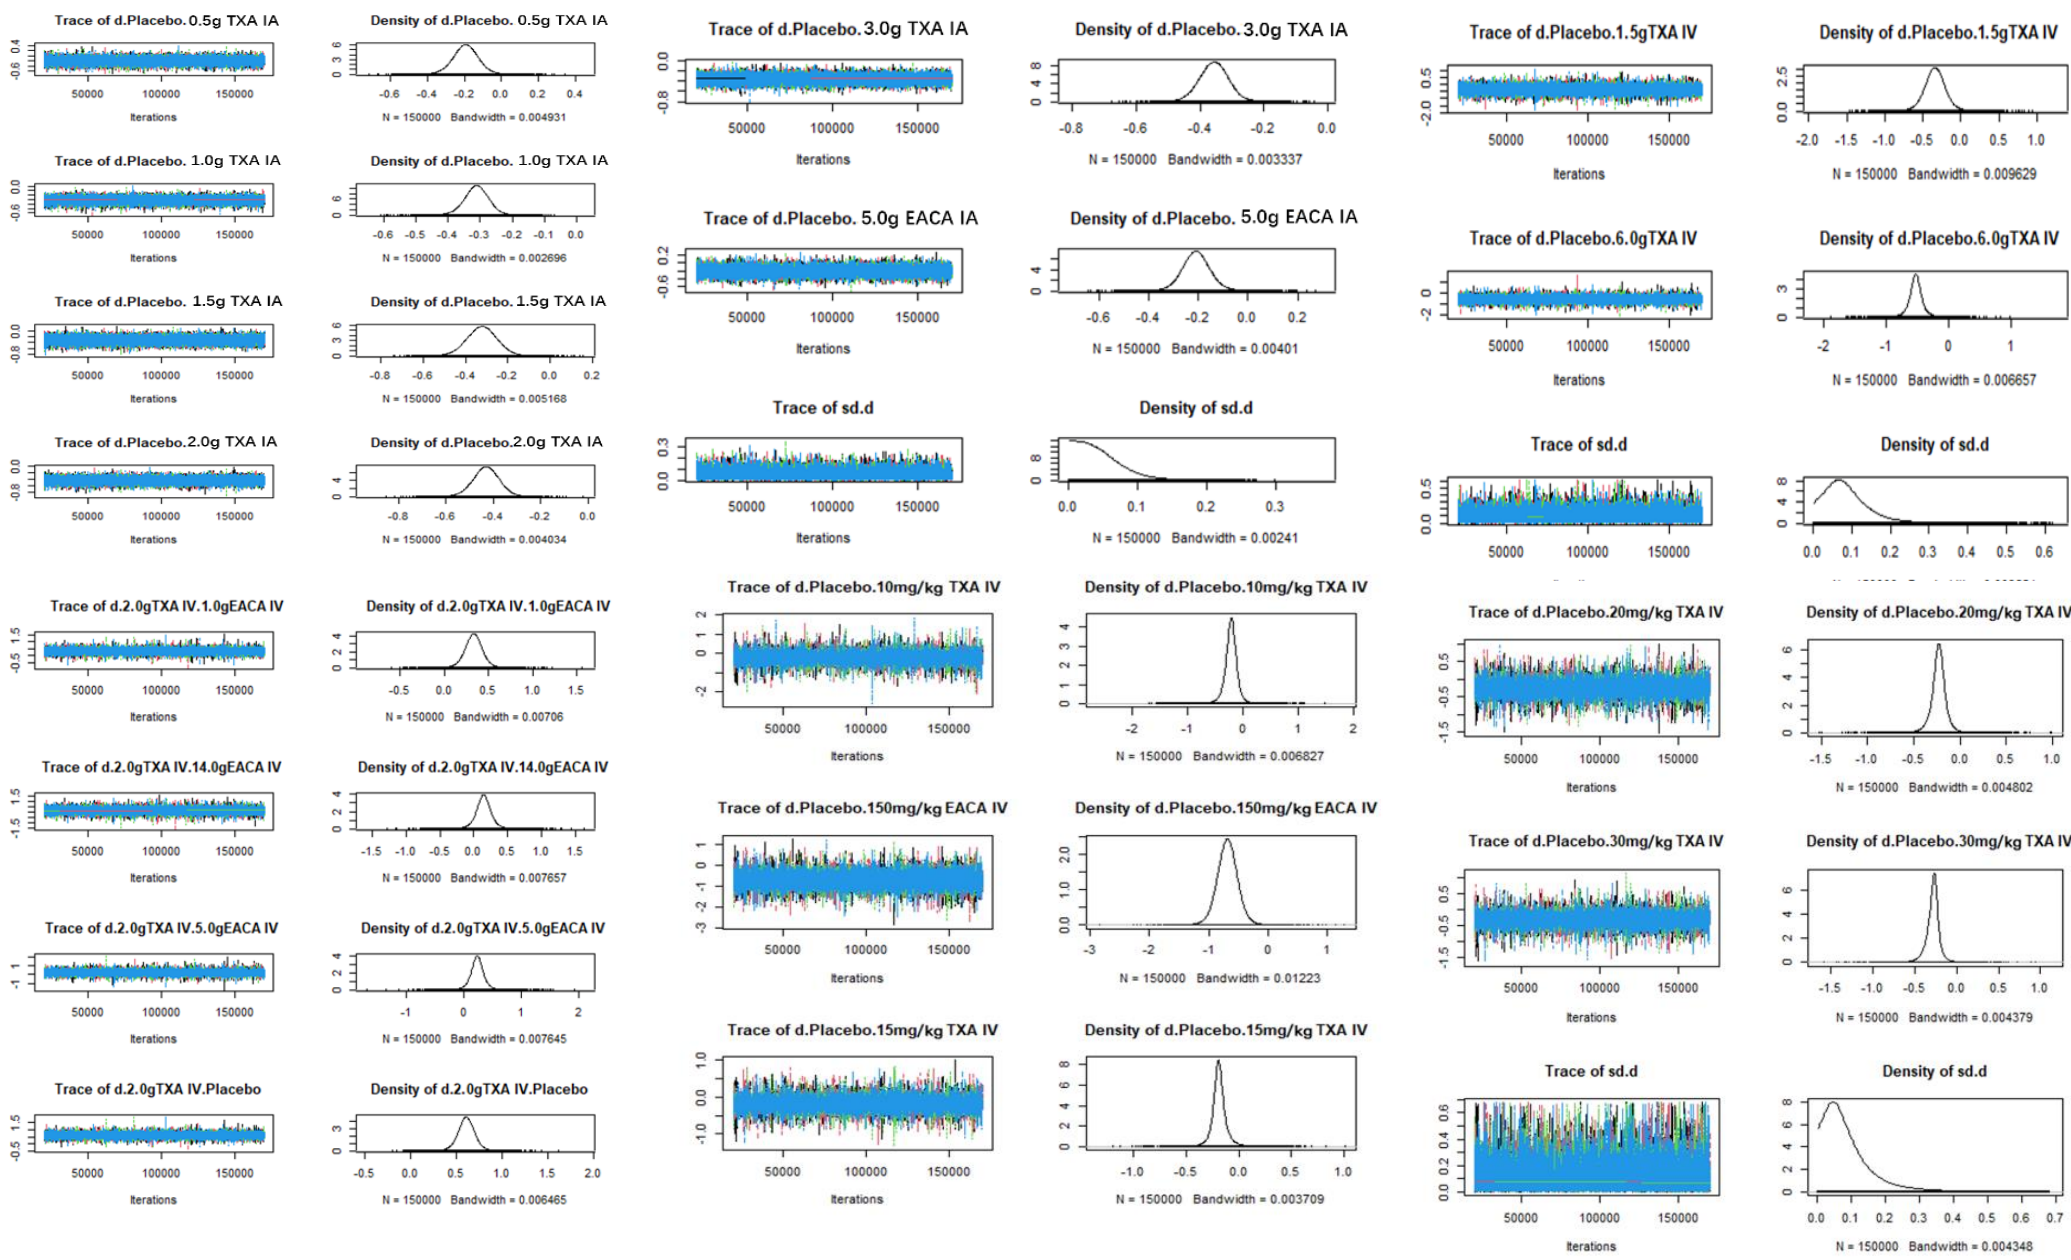

**Supplementary Material 4 (A) a.** Trace plots and density plots of total blood loss after TKA in intra-articular and intravenous (g or mg/kg) administrations of TXA and EACA.

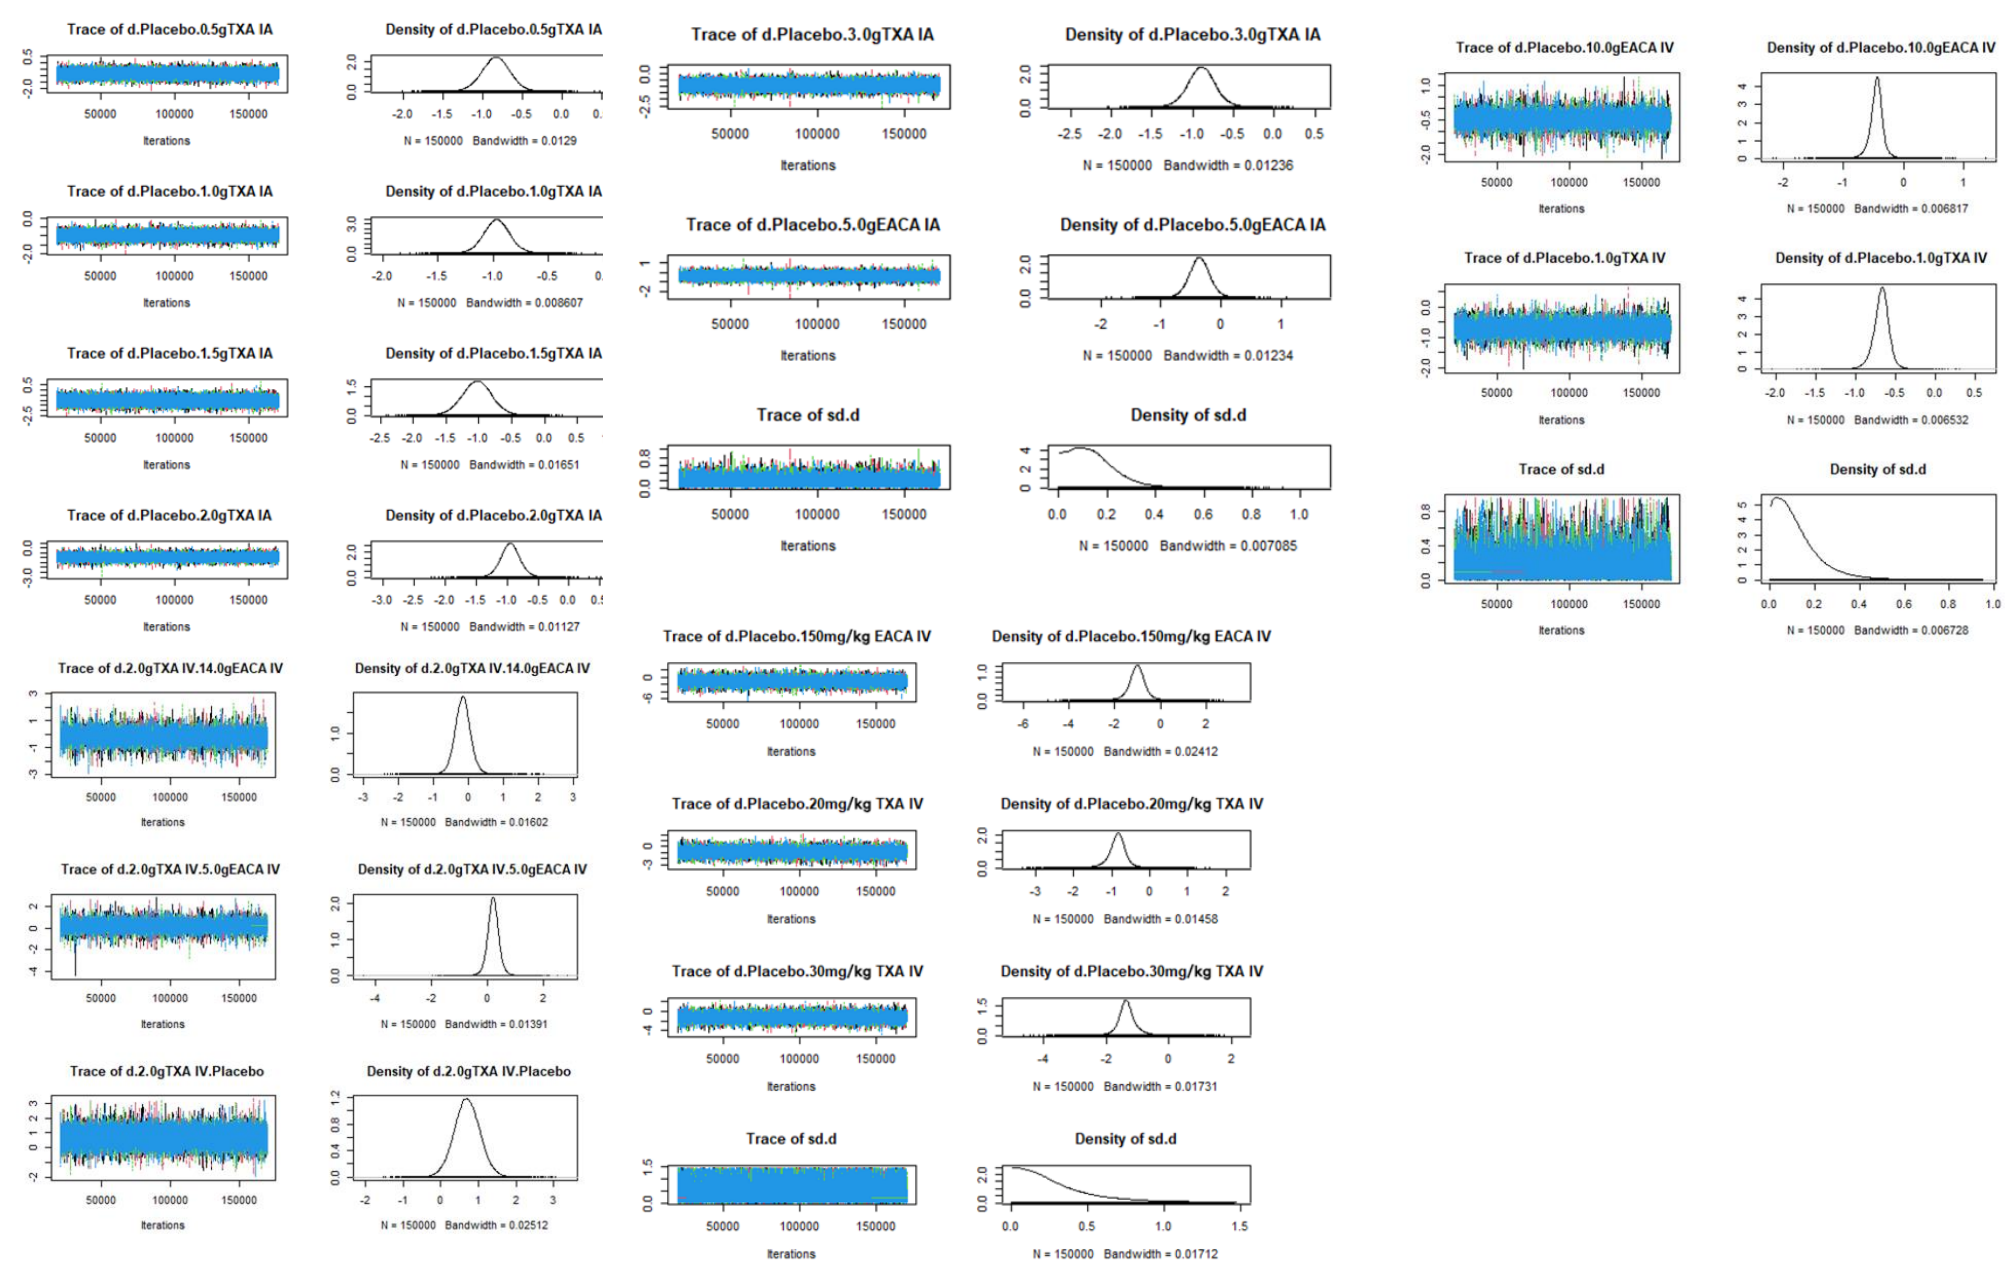

**Supplementary Material 4 (A) b.** Trace plots and density plots of HB drop after TKA in intra-articular and intravenous (g or mg/kg) administrations of TXA and EACA.

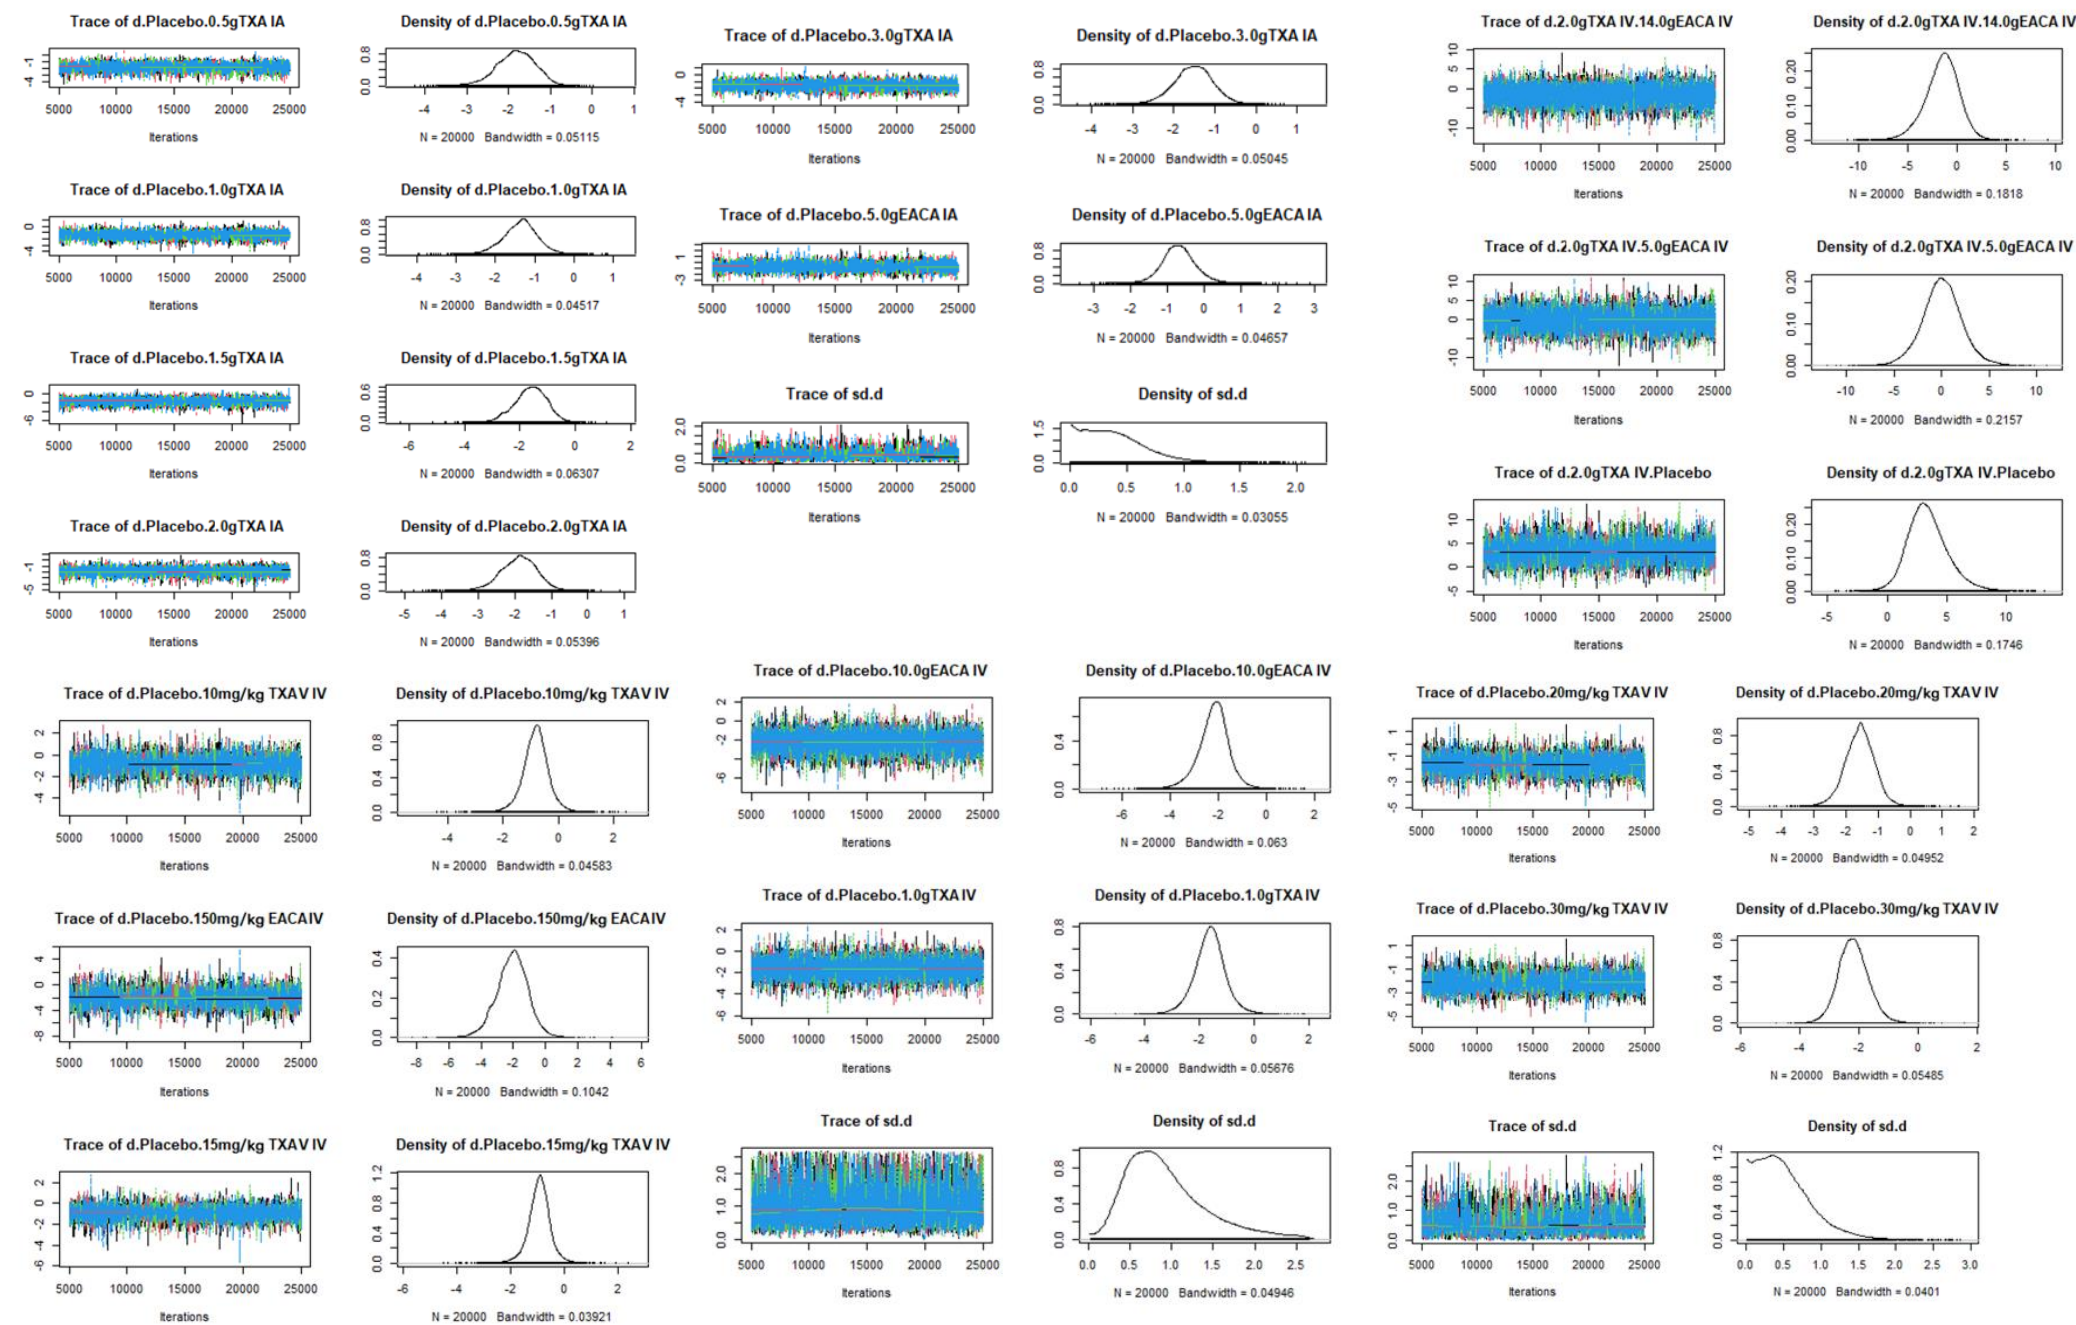

**Supplementary Material 4 (A) c.** Trace plots and density plots of transfusion rates after TKA in intra-articular and intravenous (g or mg/kg) administrations of TXA and EACA.

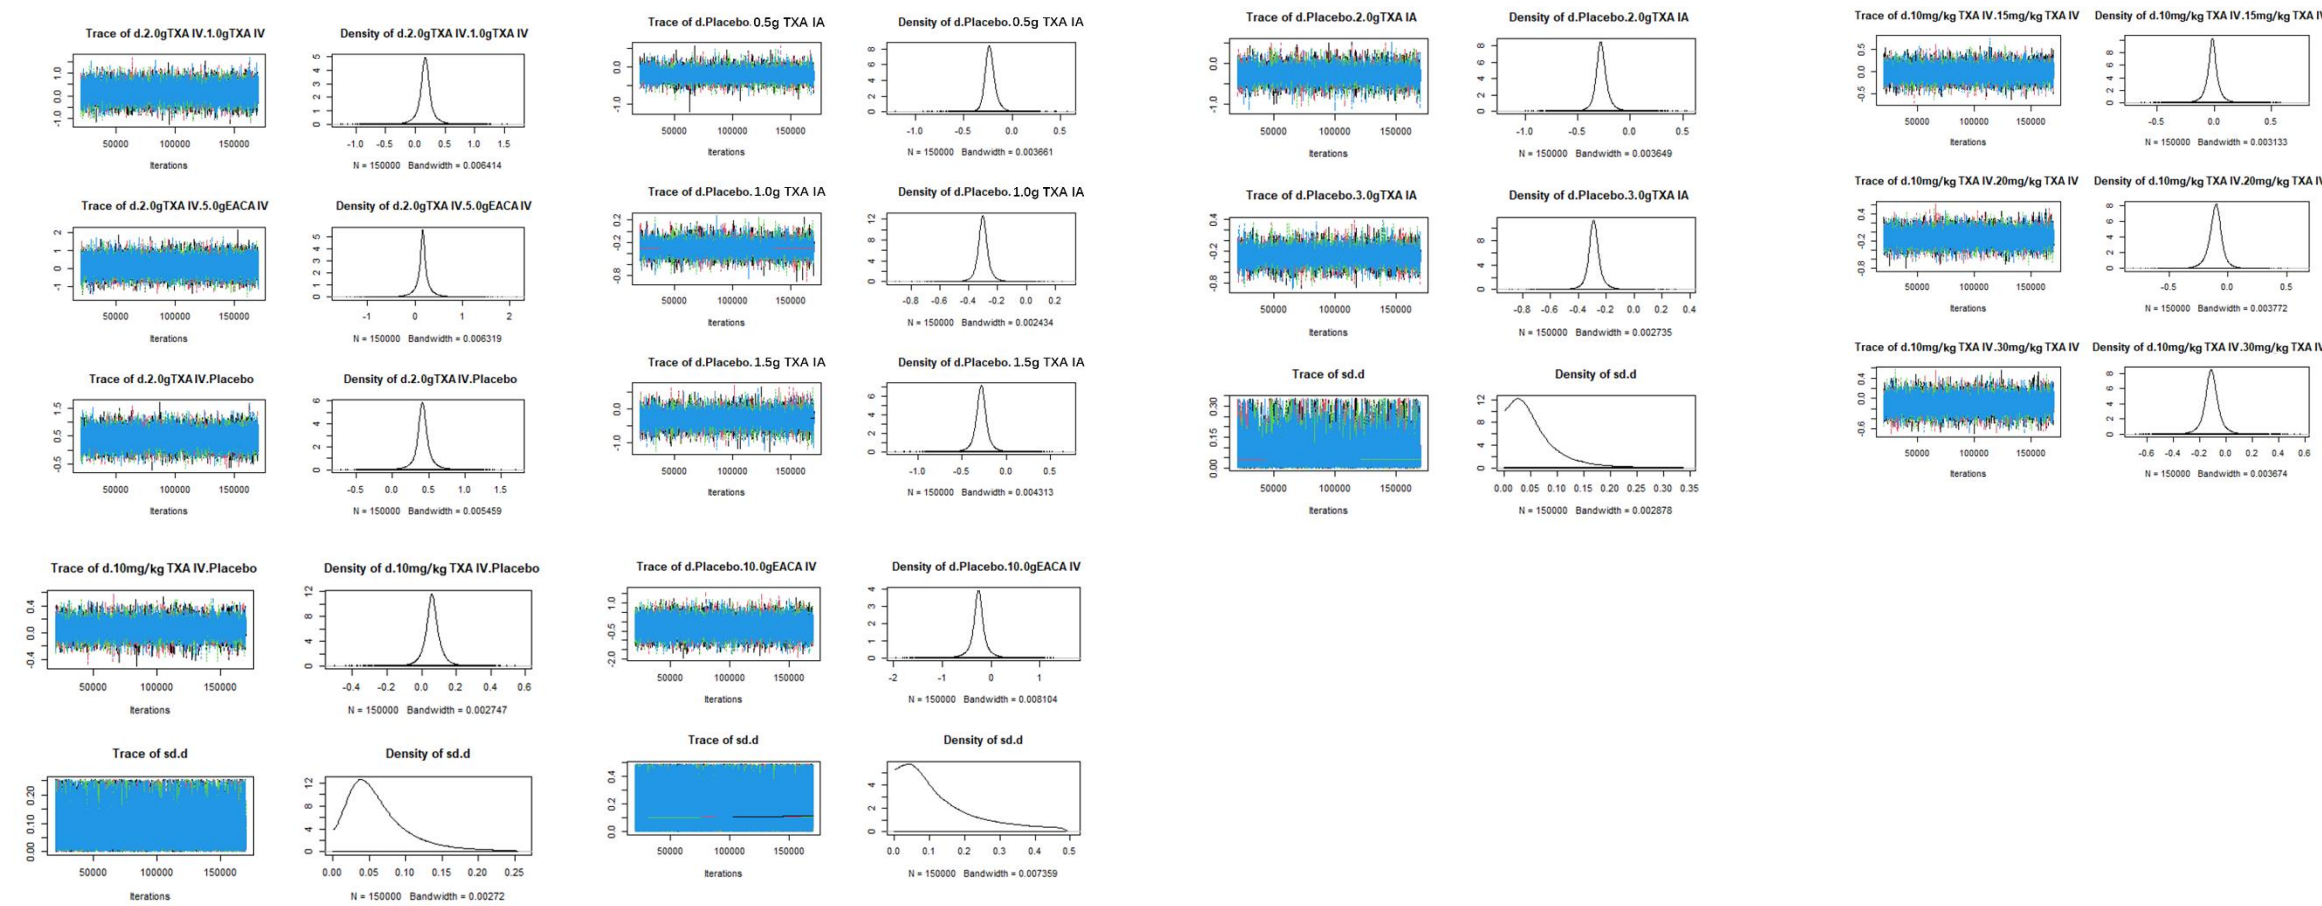

**Supplementary Material 4 (A) d.** Trace plots and density plots of drainage volume after TKA in intra-articular and intravenous (g or mg/kg) administrations of TXA and EACA.

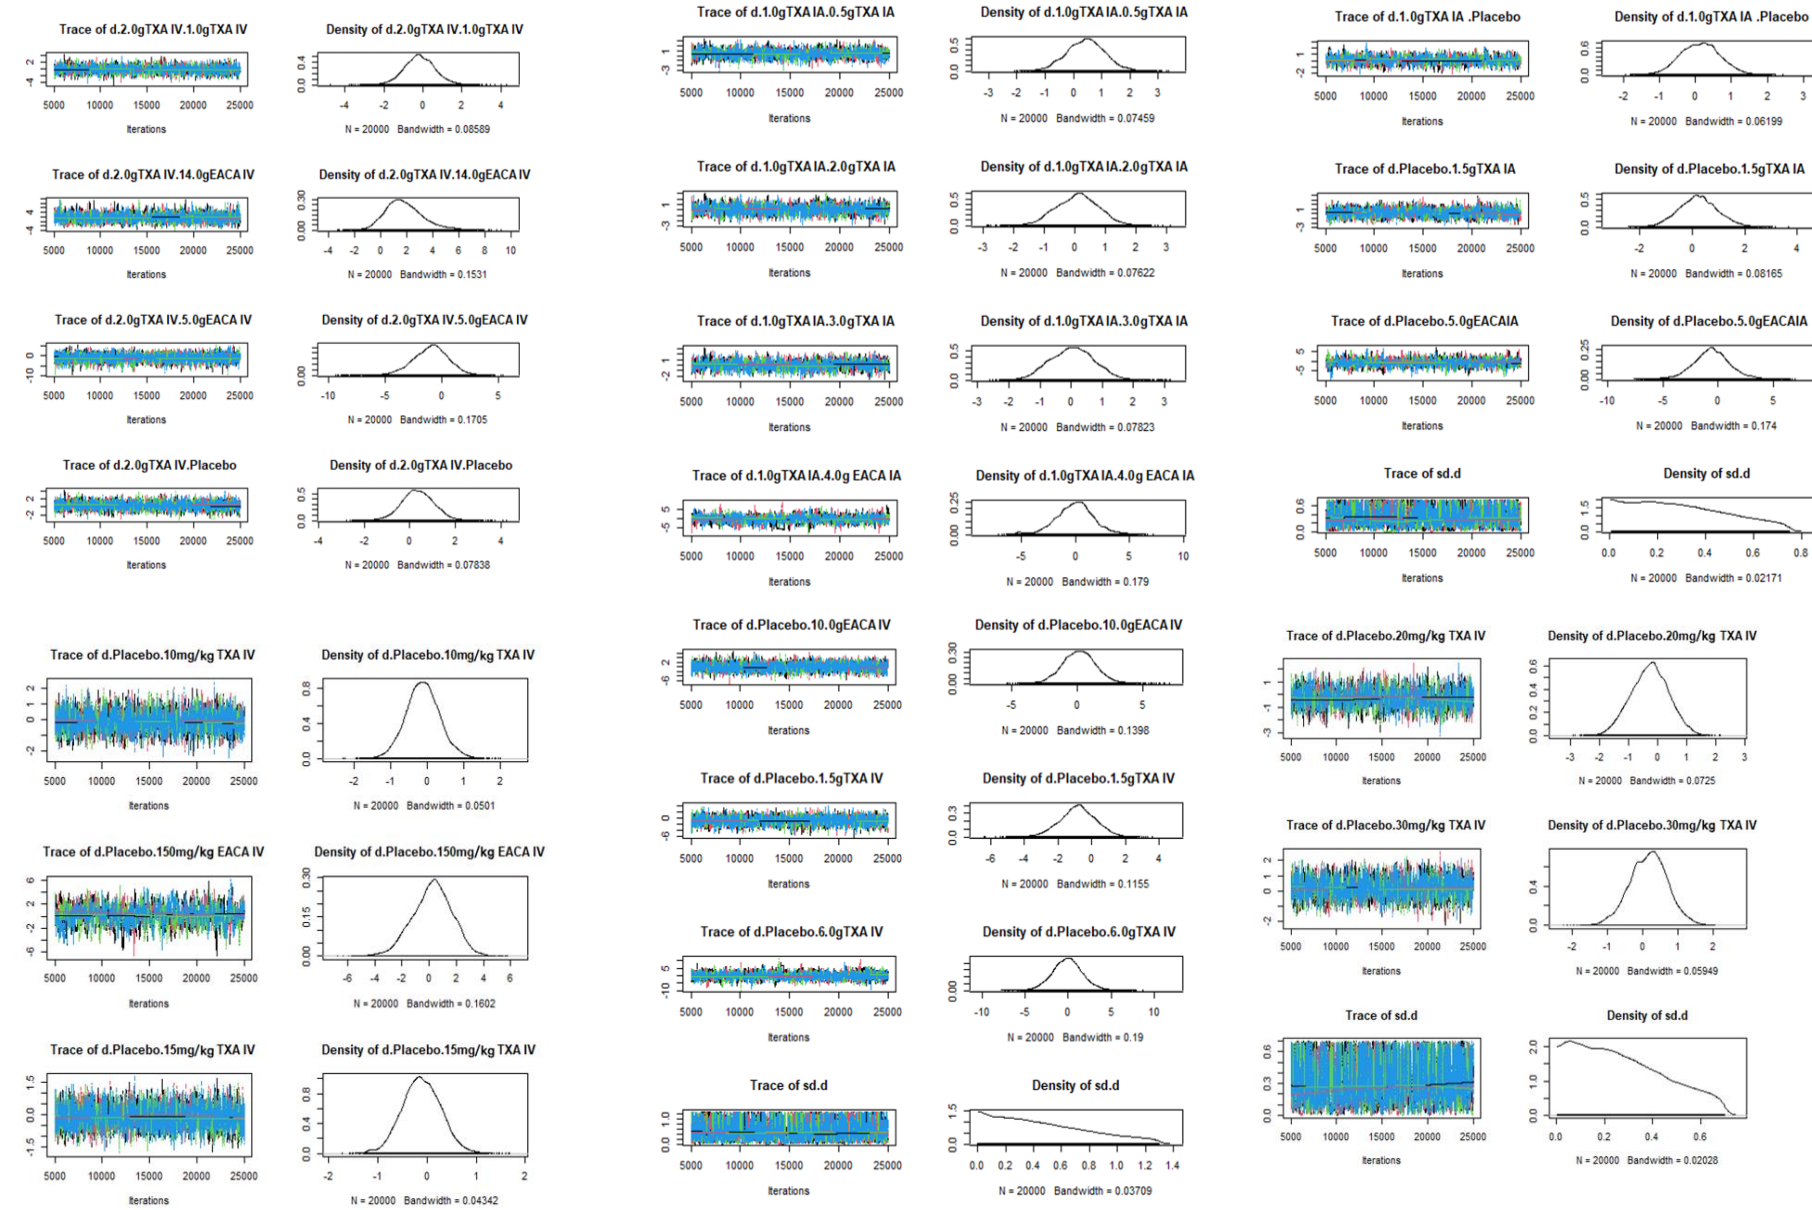

**Supplementary Material 4 (A) e.** Trace plots and density plots of PE/DVT rates after TKA in intra-articular and intravenous (g or mg/kg) administrations of TXA and EACA.

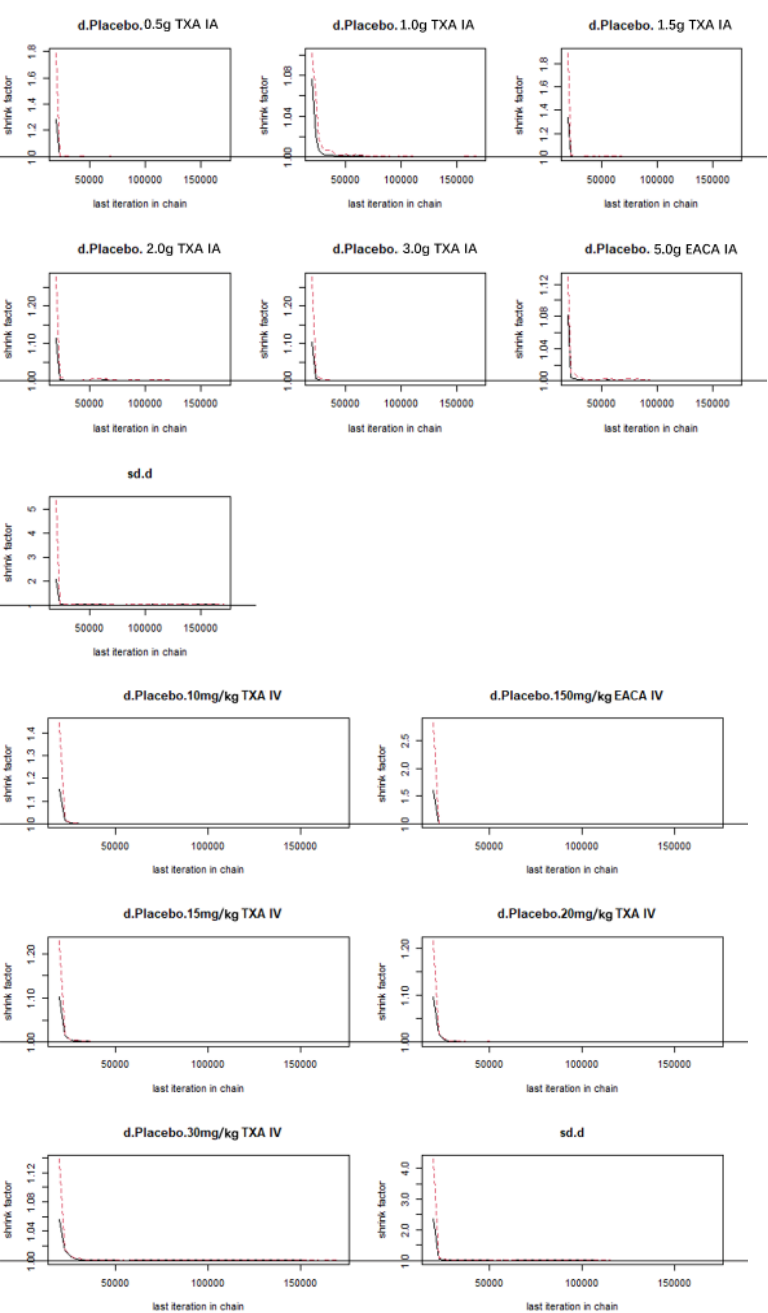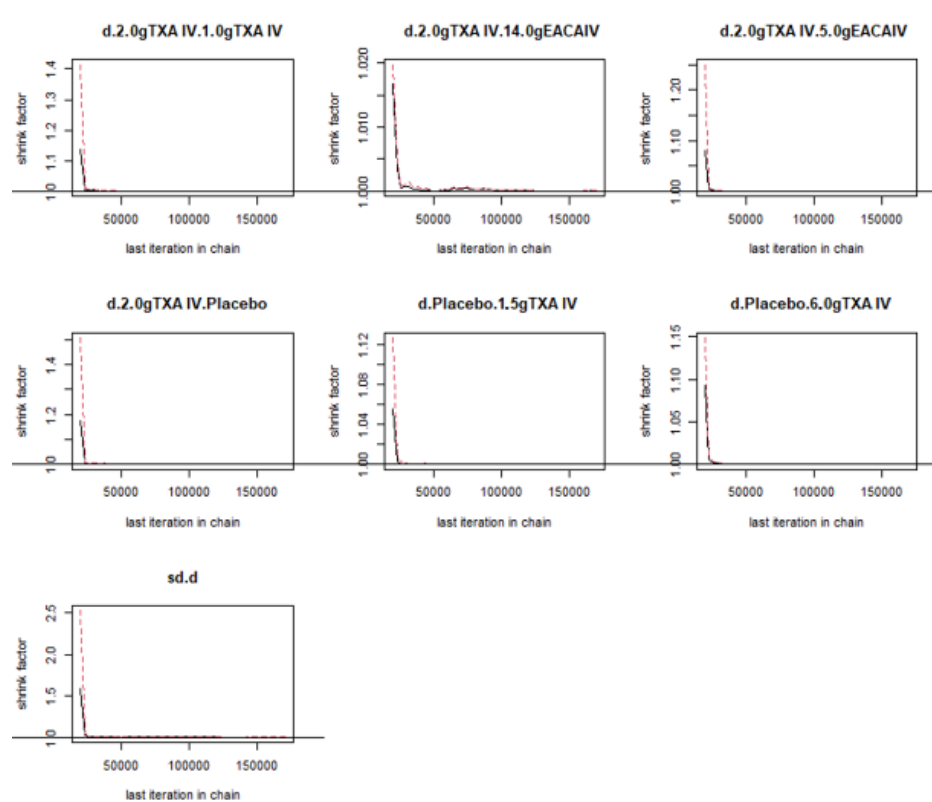

**Supplementary Material 4 (B) a.** Brooks-Gelman-Rubin plots of total blood loss after TKA in intra-articular and intravenous (g or mg/kg) administrations of TXA and EACA.

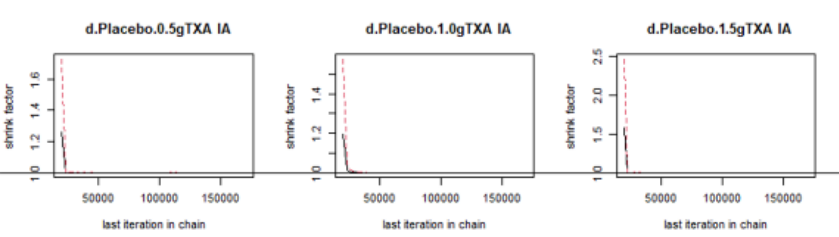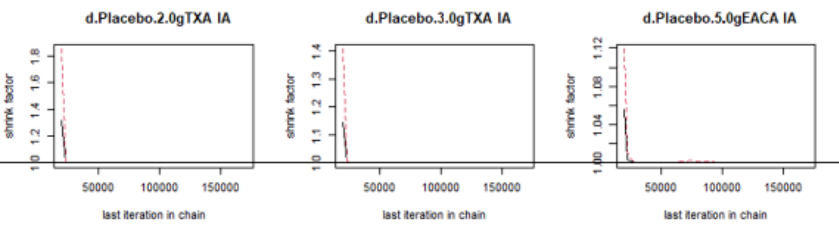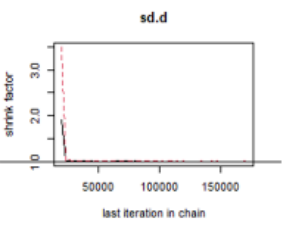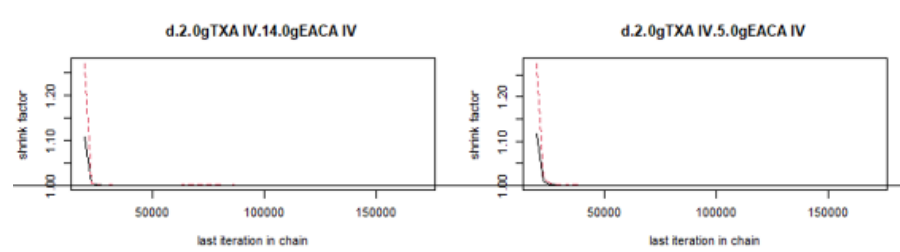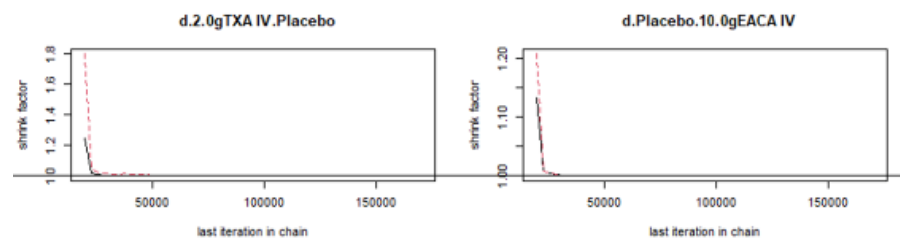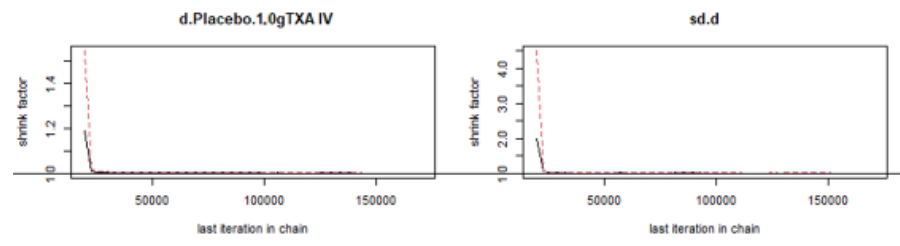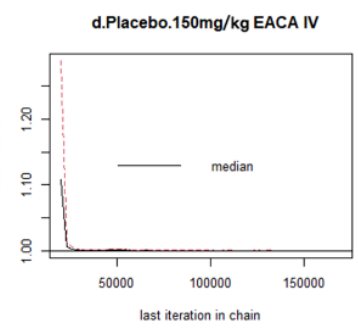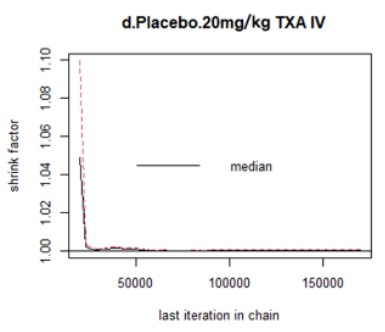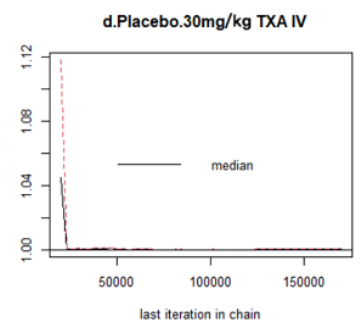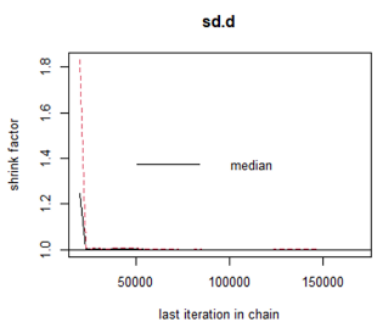

**Supplementary Material 4 (B) b.** Brooks-Gelman-Rubin plots of HB drop after TKA in intra-articular and intravenous (g or mg/kg) administrations of TXA and EACA.

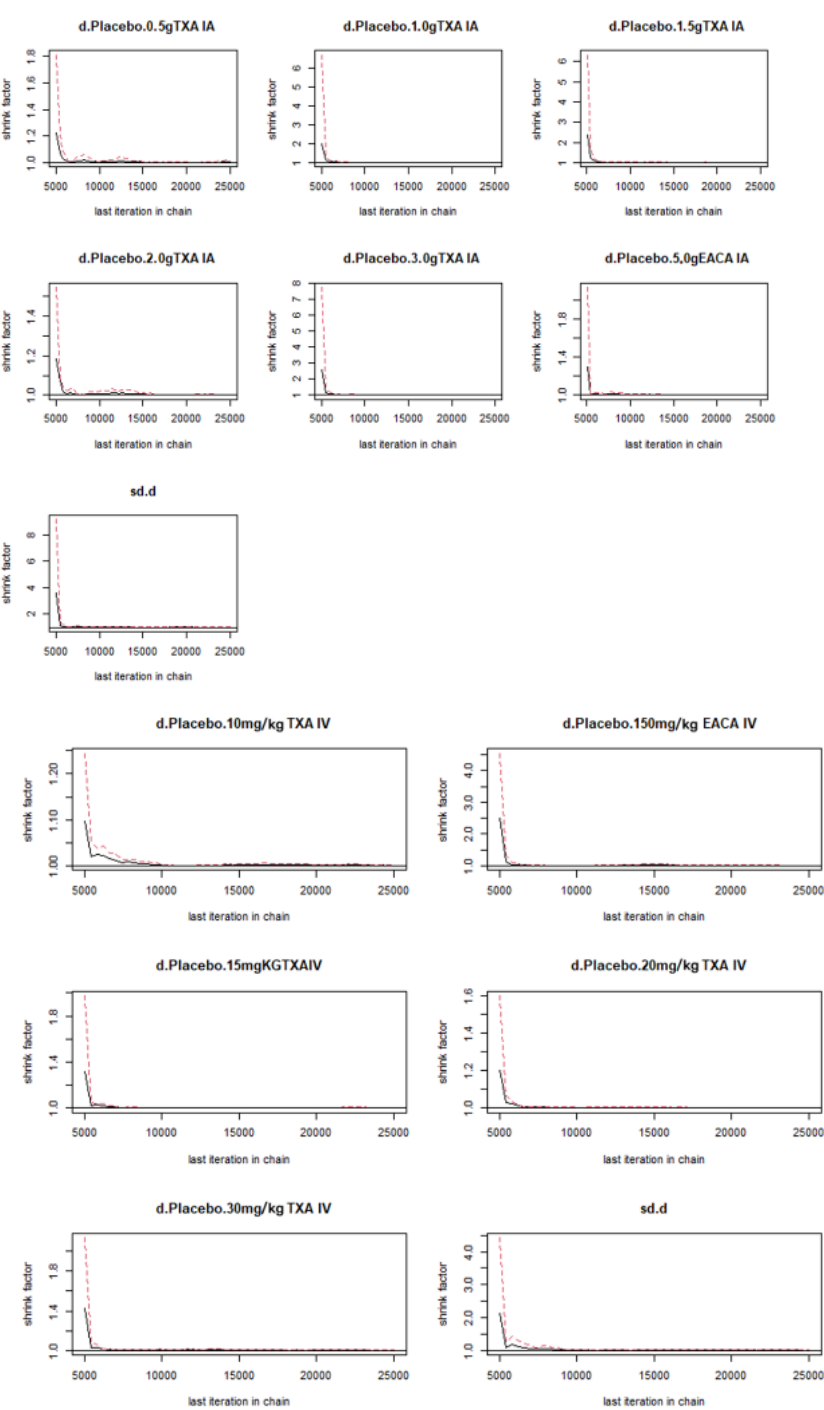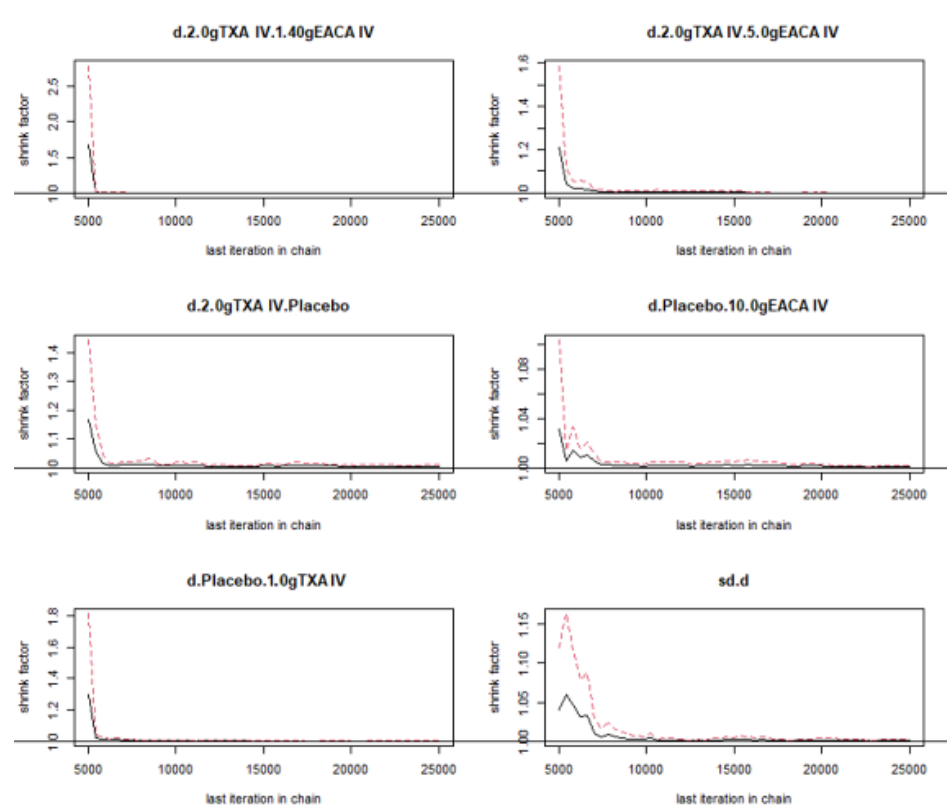

**Supplementary Material 4 (B) c.** Brooks-Gelman-Rubin plots of transfusion rates after TKA in intra-articular and intravenous (g or mg/kg) administrations of TXA and EACA.



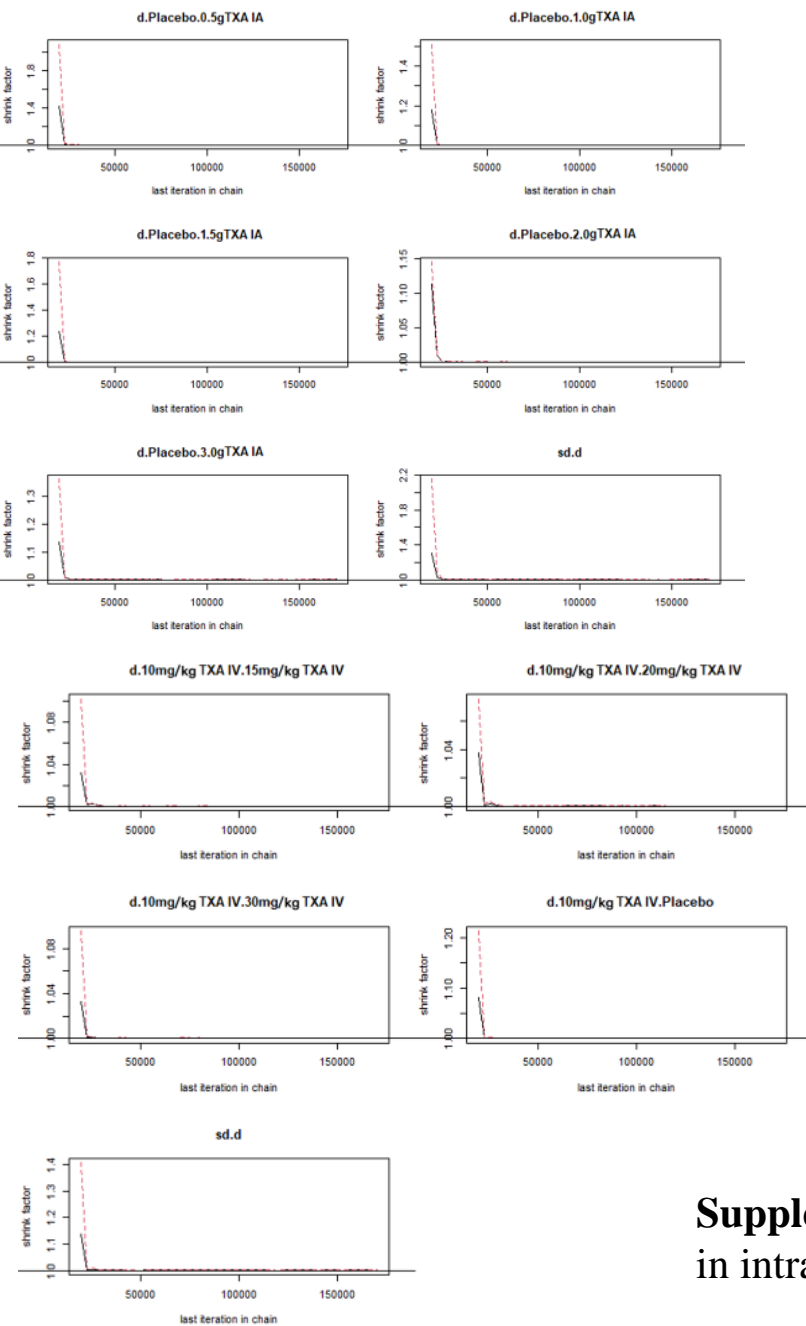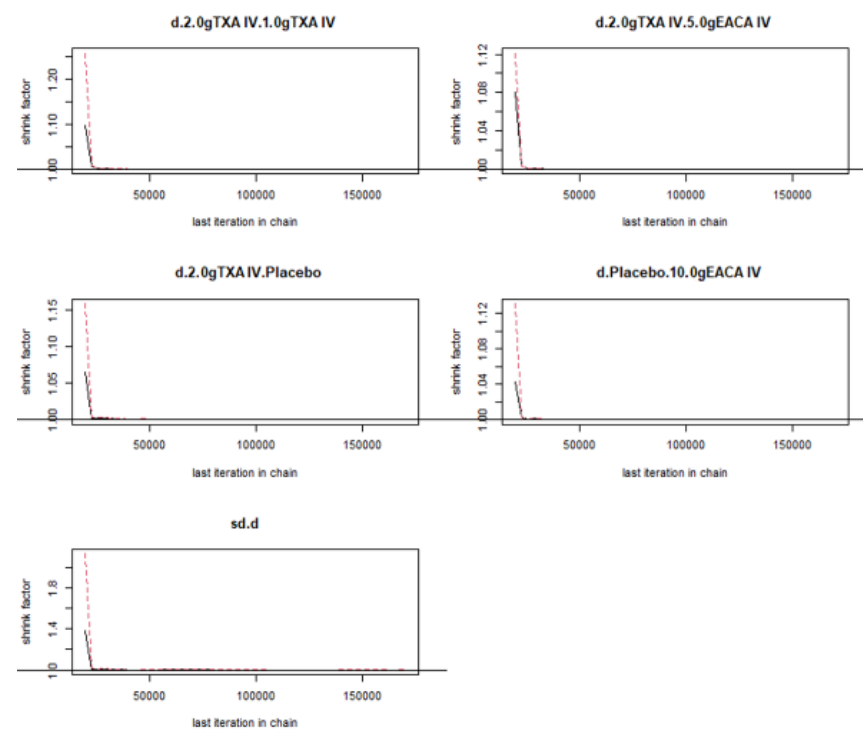

**Supplementary Material 4 (B) d.** Brooks-Gelman-Rubin plots of drainage volume after TKA in intra-articular and intravenous (g or mg/kg) administrations of TXA and EACA.

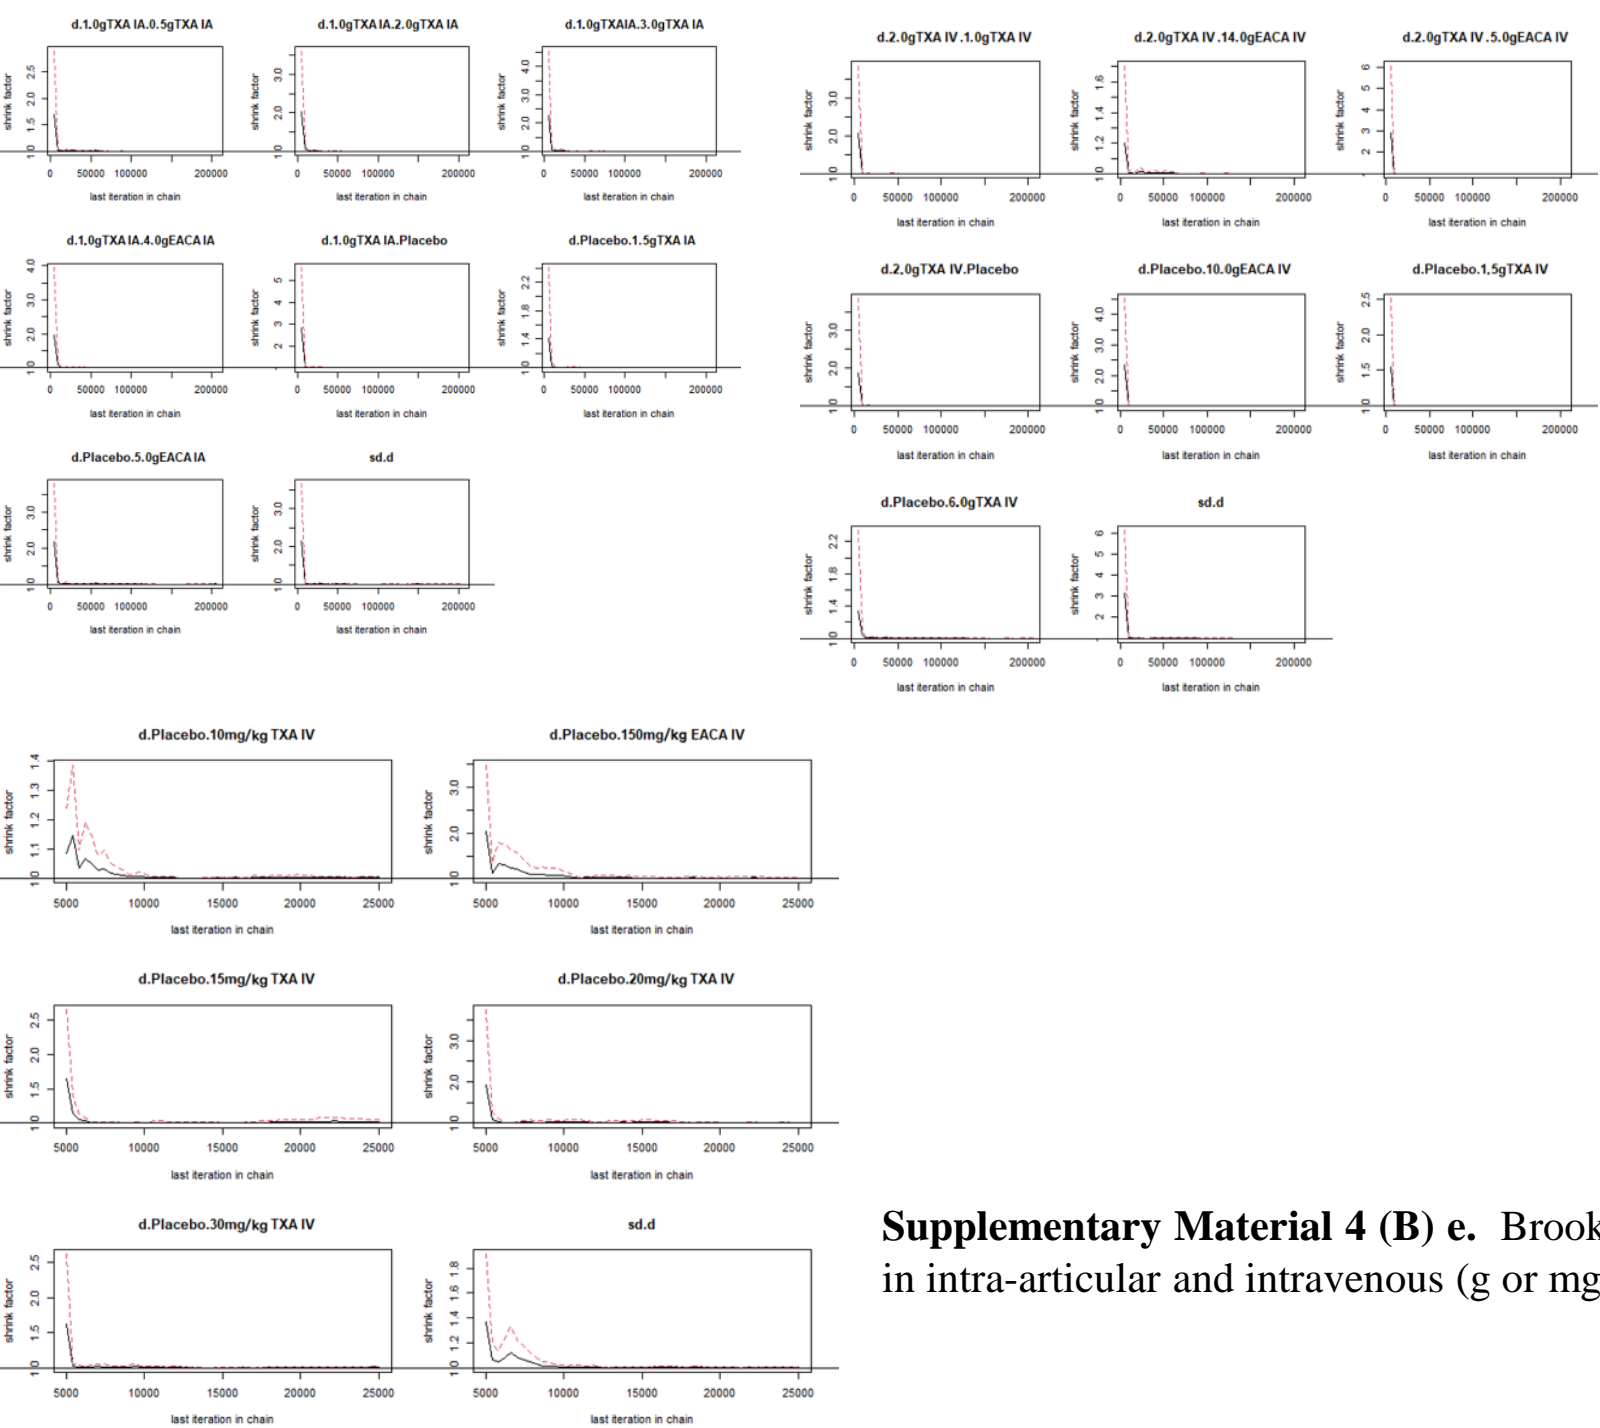

**Supplementary Material 4 (B) e.** Brooks-Gelman-Rubin plots of PE/DVT rates after TKA in intra-articular and intravenous (g or mg/kg) administrations of TXA and EACA

**Supplementary Material 4 (C) a.** Heterogeneity for total blood loss after TKA in intra-articular and intravenous (g or mg/kg) administrations of TXA and EACA.

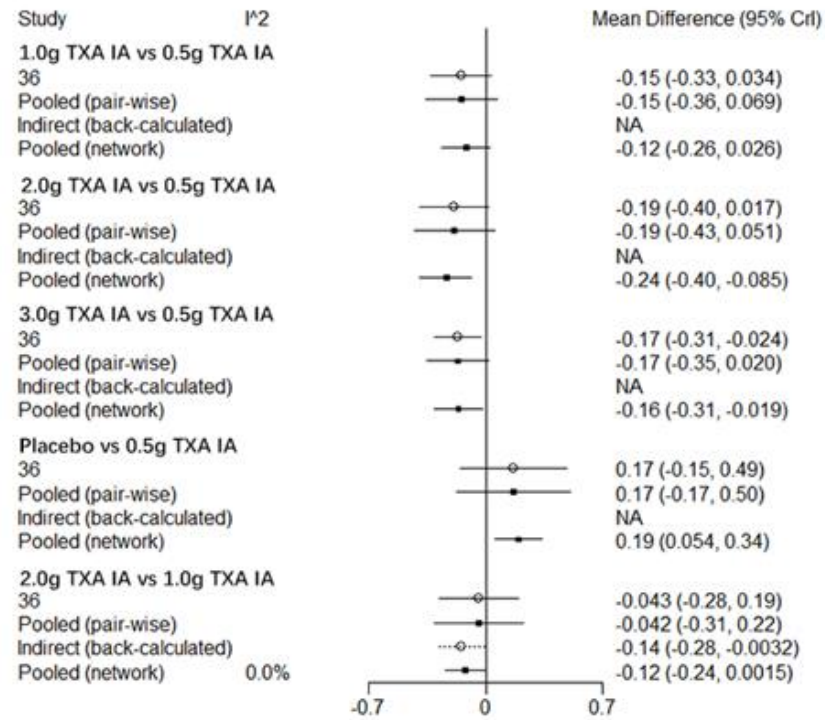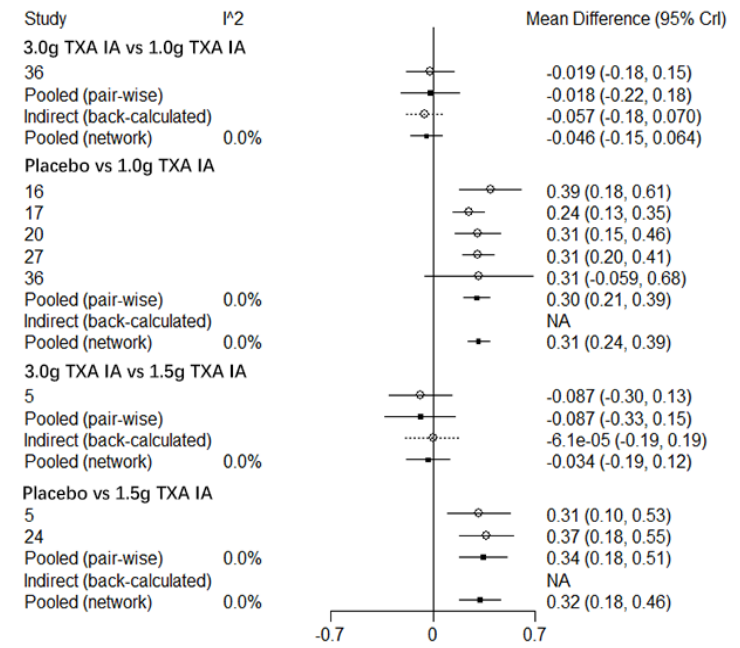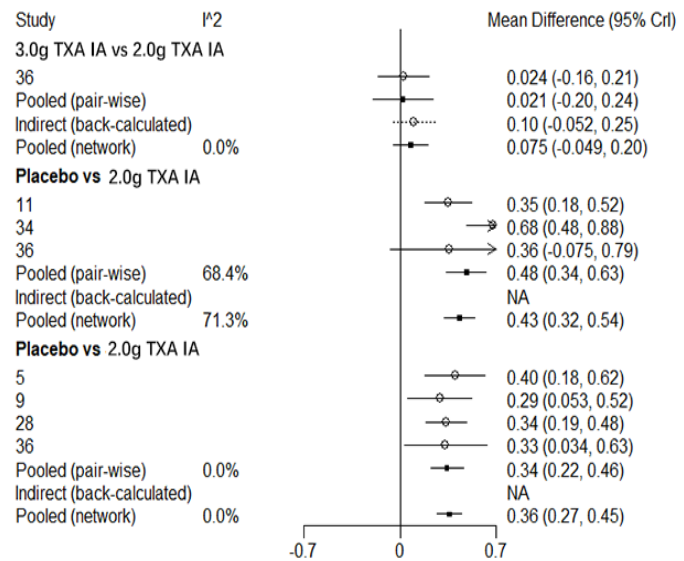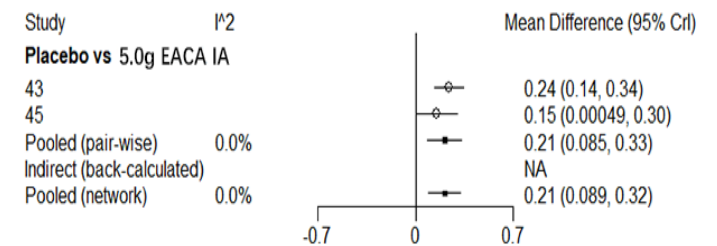

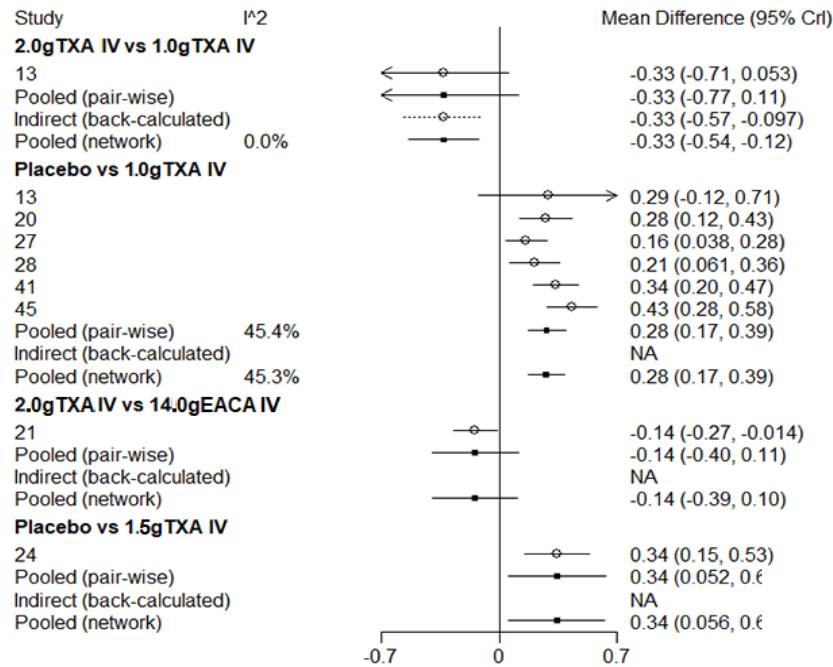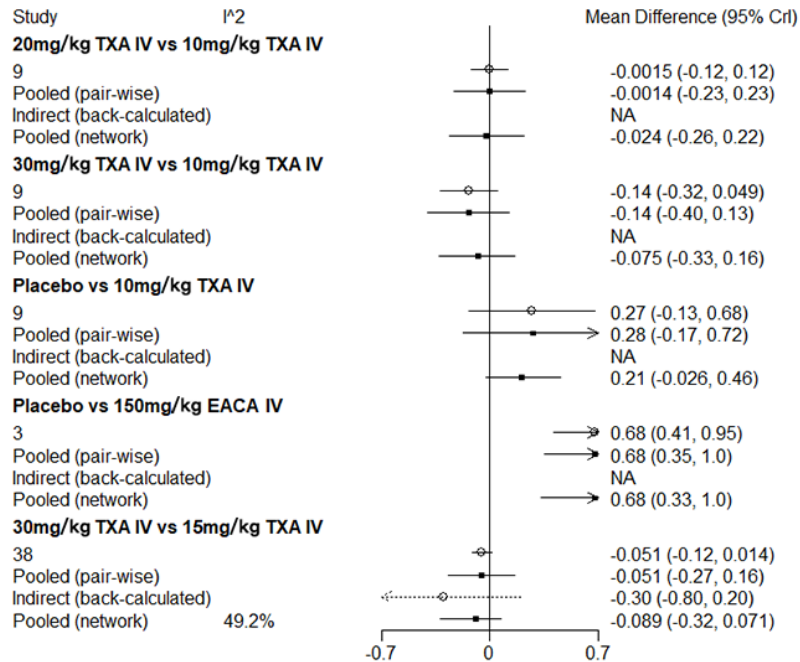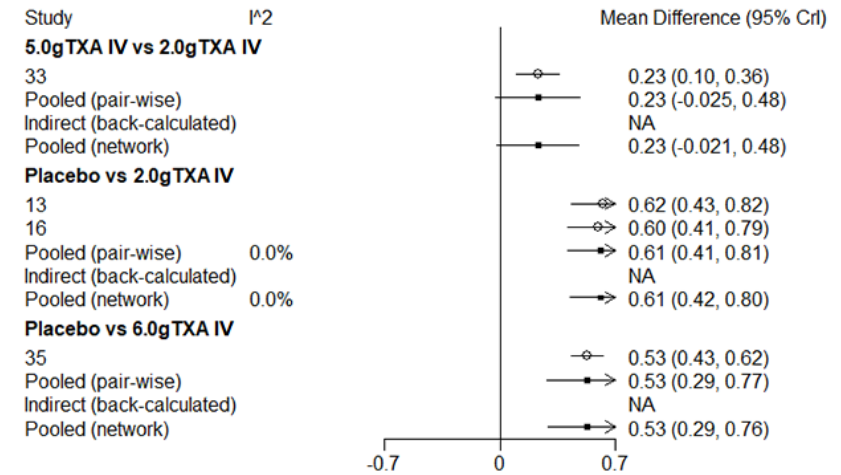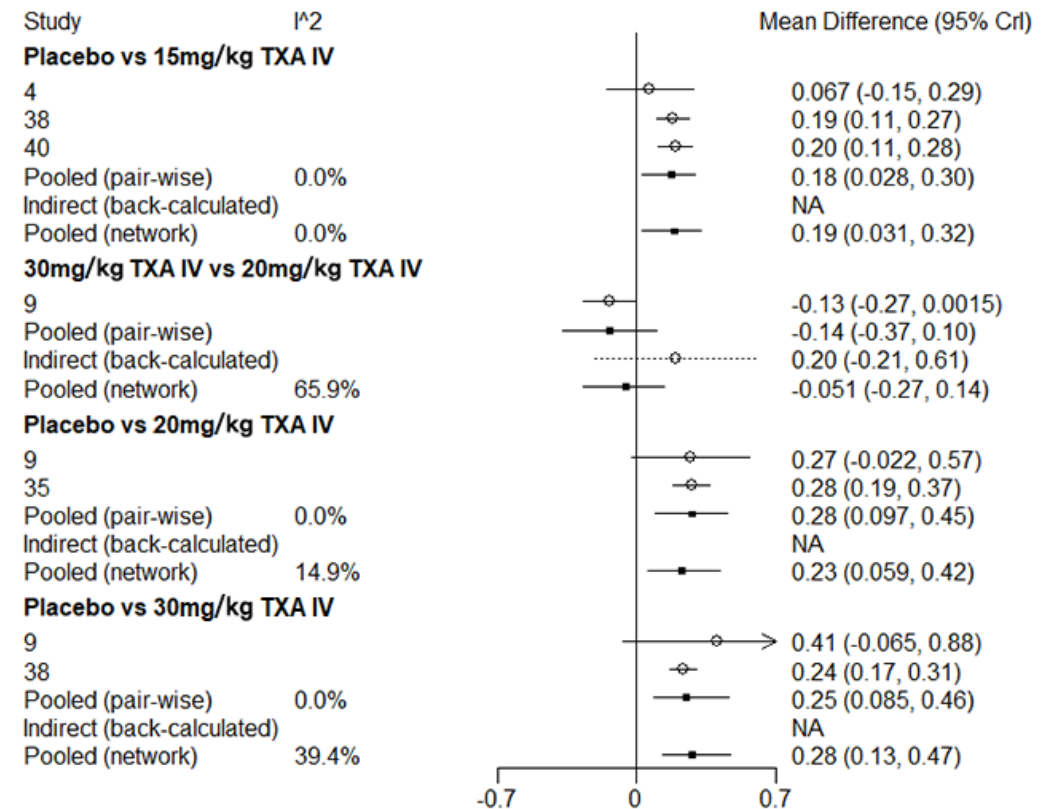

**Supplementary Material 4 (C) b.** Heterogeneity for HB drop after TKA in intra-articular and intravenous (g or mg/kg) administrations of TXA and EACA.

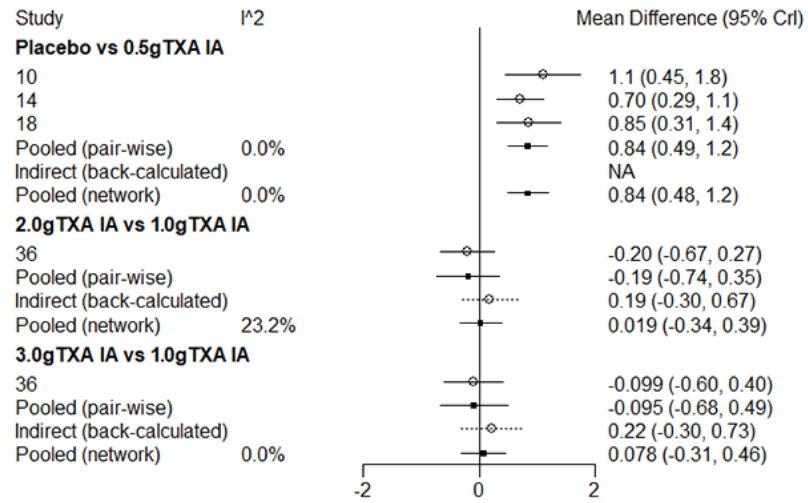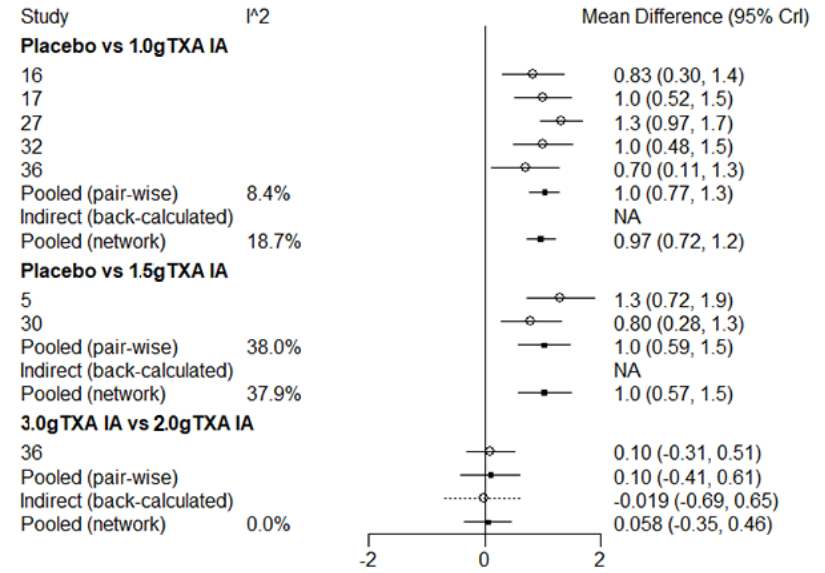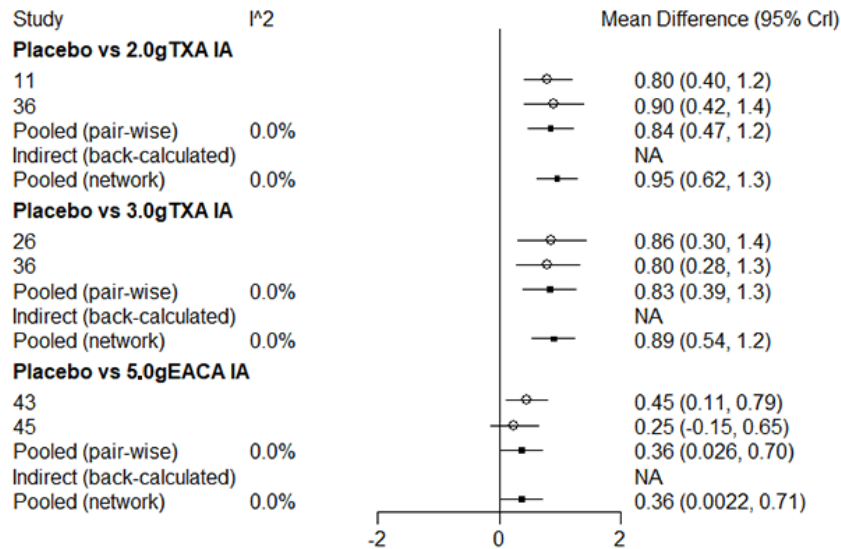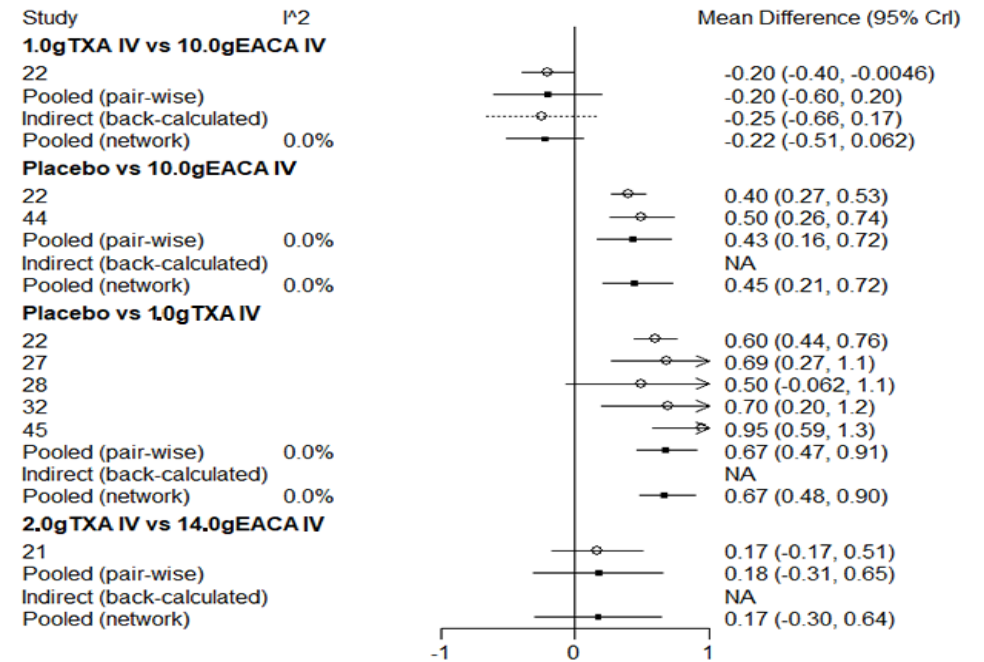

Study I<sup>2</sup>  
**5.0gEACA IV vs 2.0gTXA IV**

33  
 Pooled (pair-wise)  
 Indirect (back-calculated)  
 Pooled (network)

**Placebo vs 2.0gTXA IV**

16  
 Pooled (pair-wise)  
 Indirect (back-calculated)  
 Pooled (network)

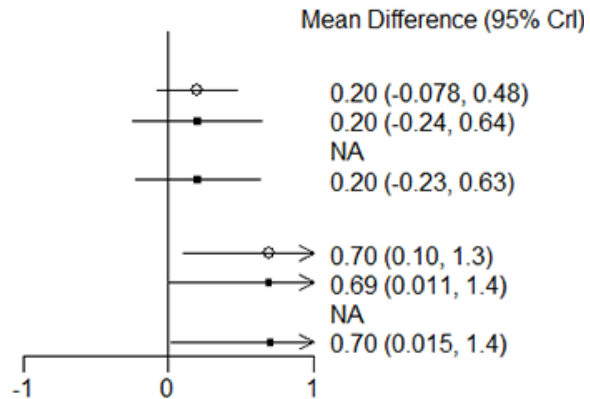

Study I<sup>2</sup>  
**20mg/kg TXA IV vs 150mg/kg EACA IV**

3  
 Pooled (pair-wise)  
 Indirect (back-calculated)  
 Pooled (network)

**Placebo vs 150mg/kg EACA IV**

3  
 Pooled (pair-wise)  
 Indirect (back-calculated)  
 Pooled (network)

**Placebo vs 20mg/kg TXA IV**

3  
 26  
 35  
 Pooled (pair-wise) 1.5%  
 Indirect (back-calculated)  
 Pooled (network) 1.0%

**Placebo vs 30mg/kg TXA IV**

23  
 25  
 Pooled (pair-wise) 9.0%  
 Indirect (back-calculated)  
 Pooled (network) 9.5%

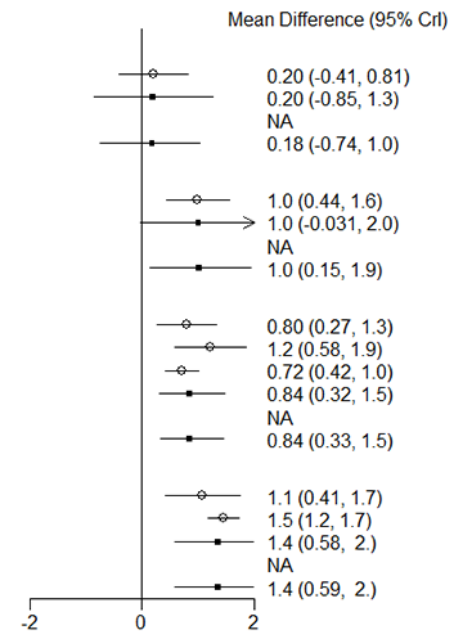



**Supplementary Material 4 (C) c.** Heterogeneity for transfusion rates after TKA in intra-articular and intravenous (g or mg/kg) administrations of TXA and EACA

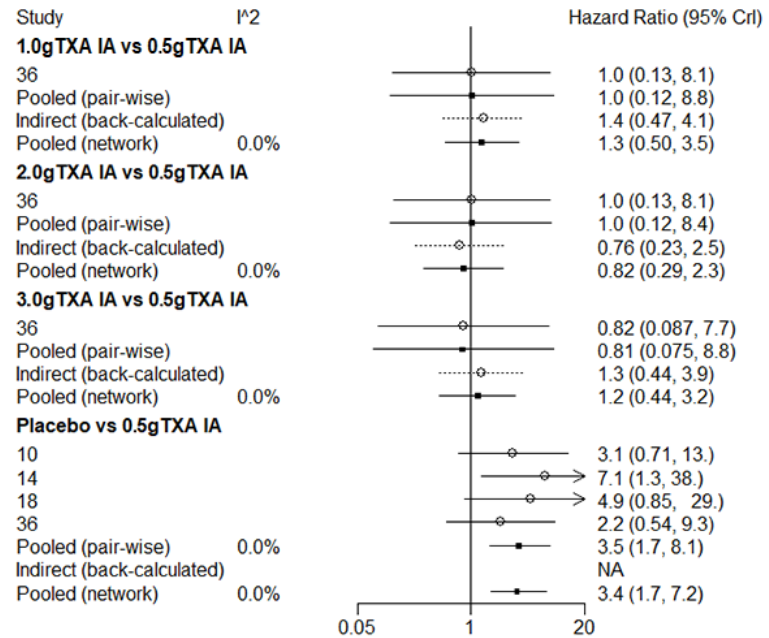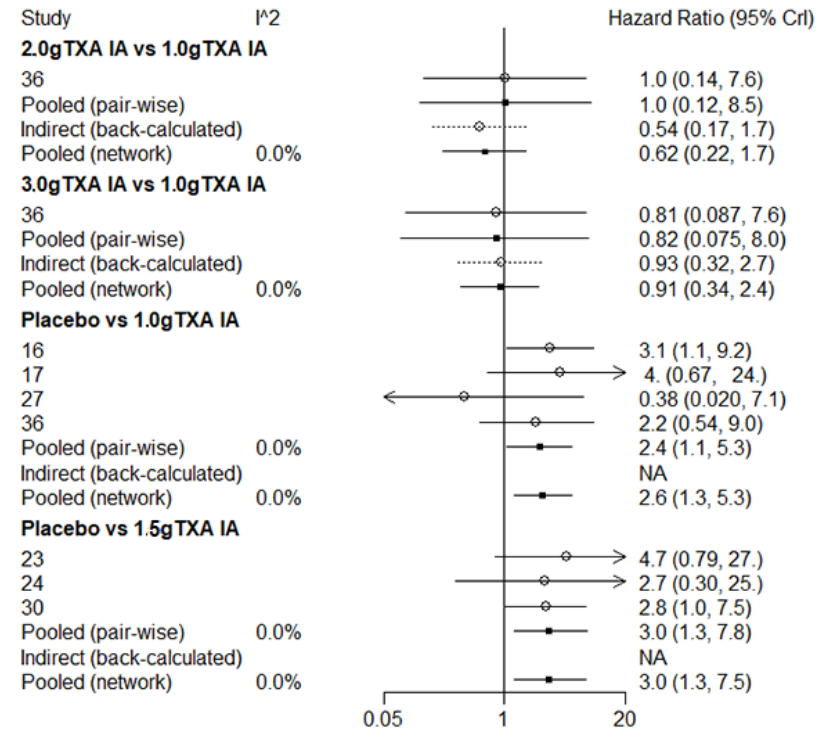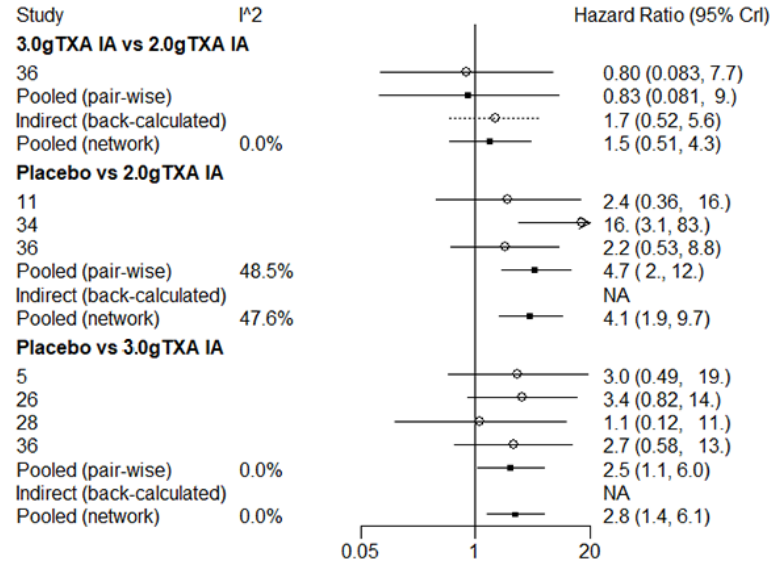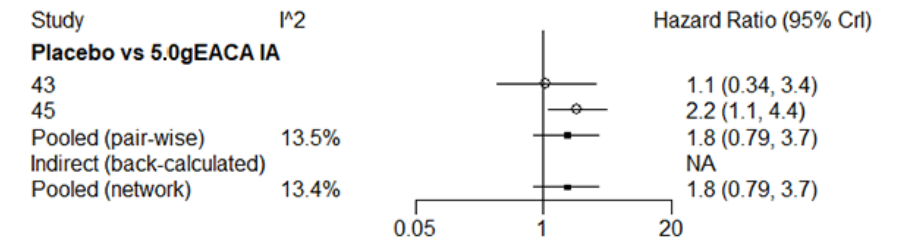

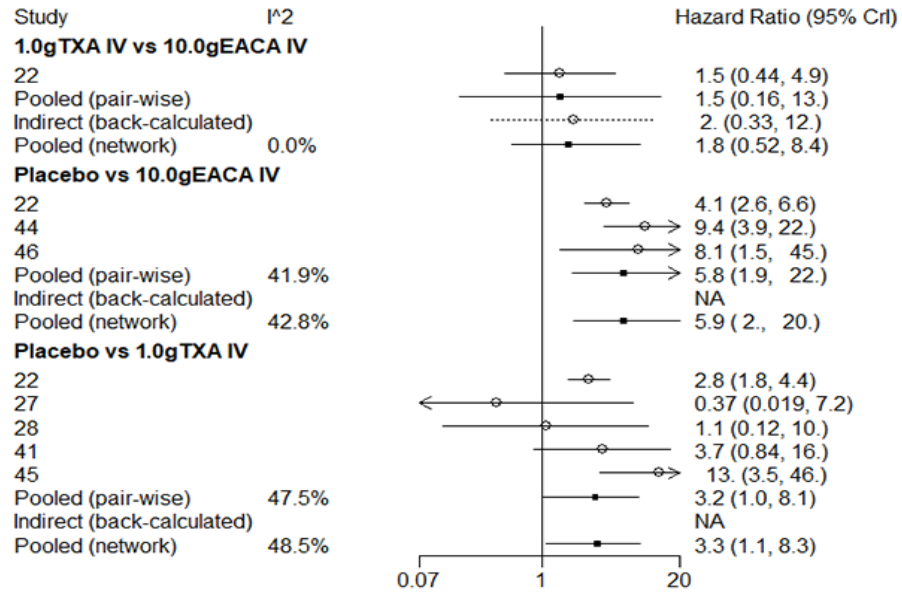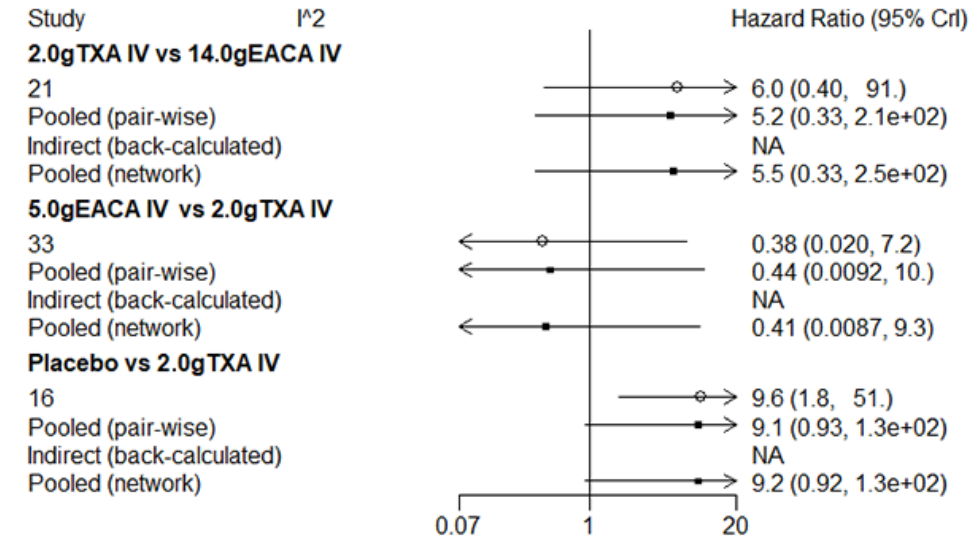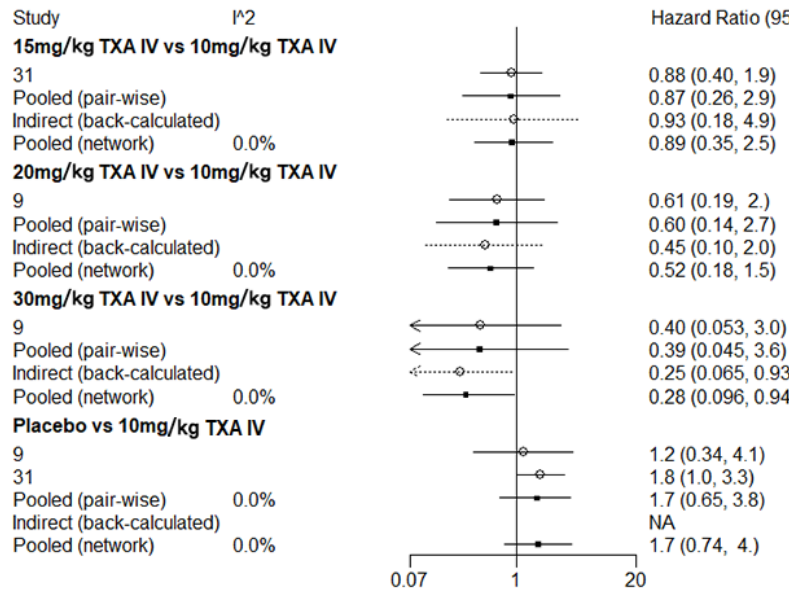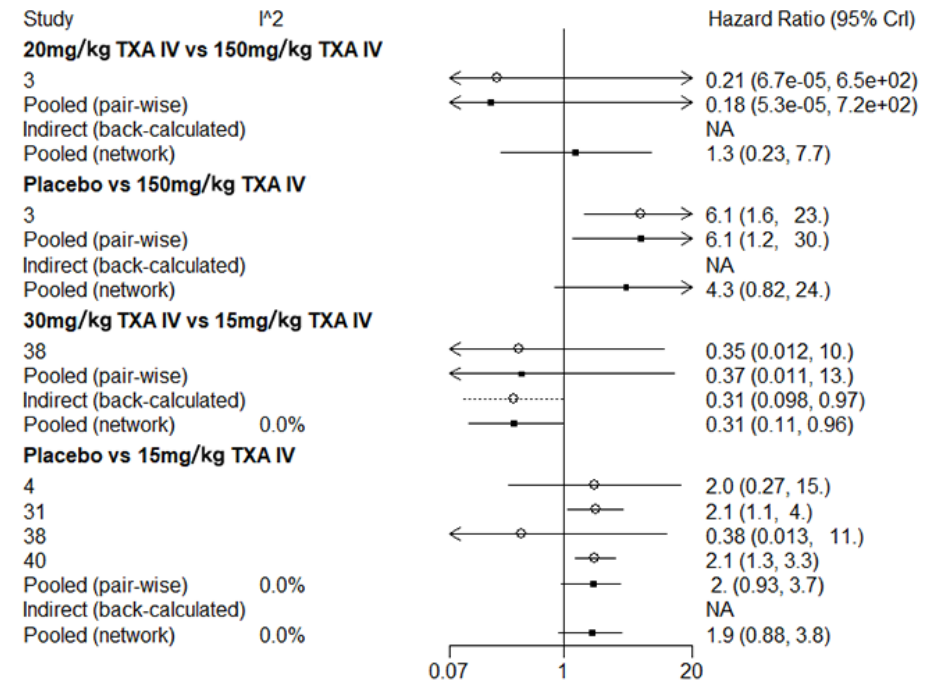

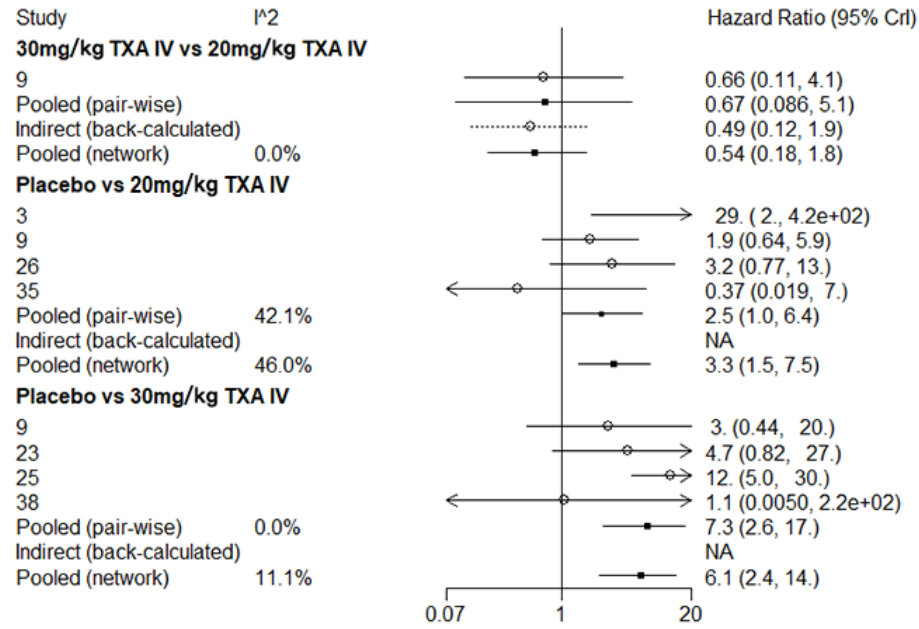

**Supplementary Material 4 (C) d.** Heterogeneity for drainage volume after TKA in intra-articular and intravenous (g or mg/kg) administrations of TXA and EACA.

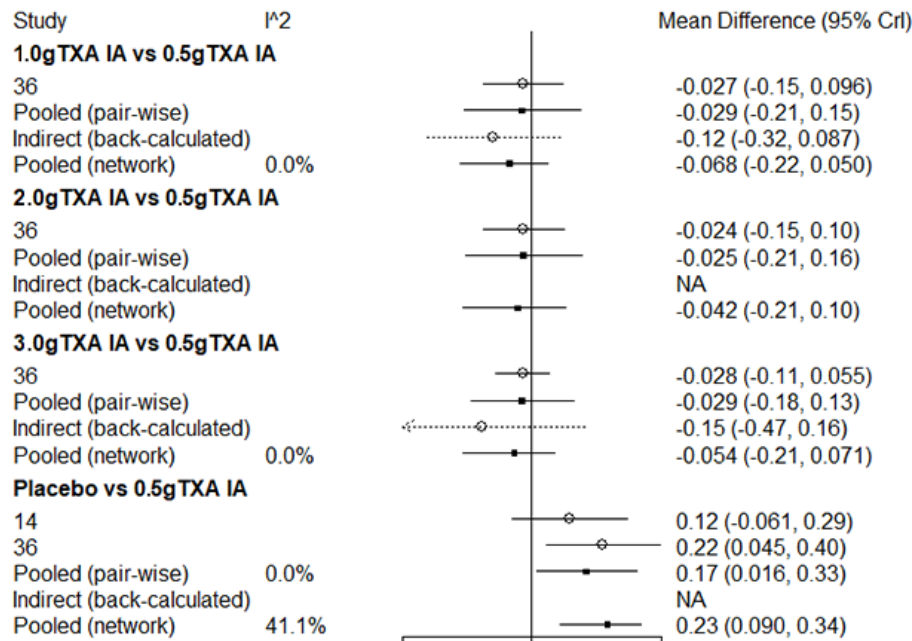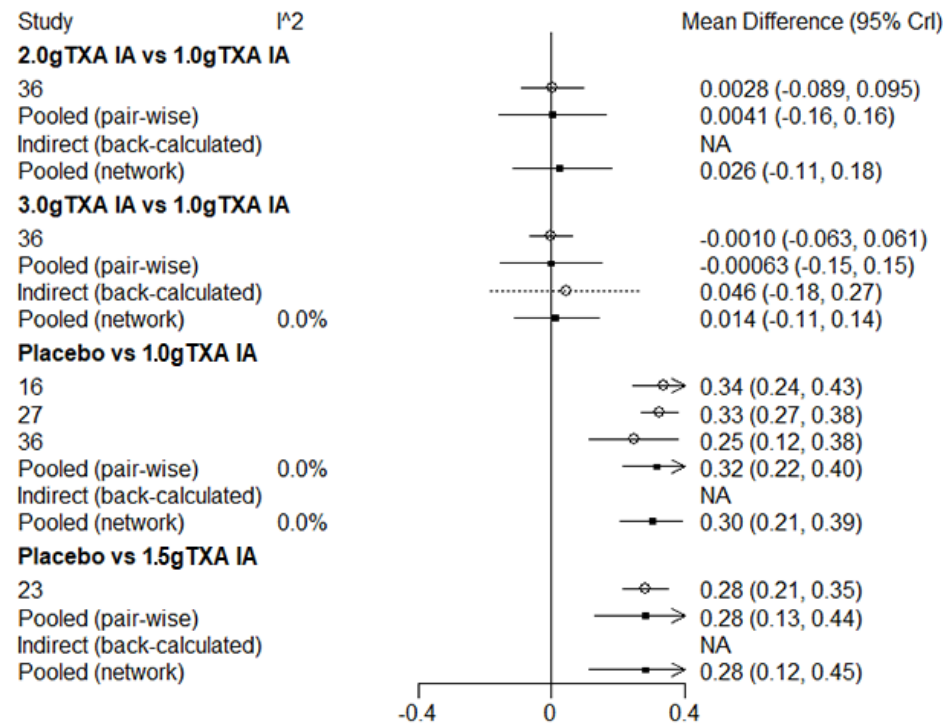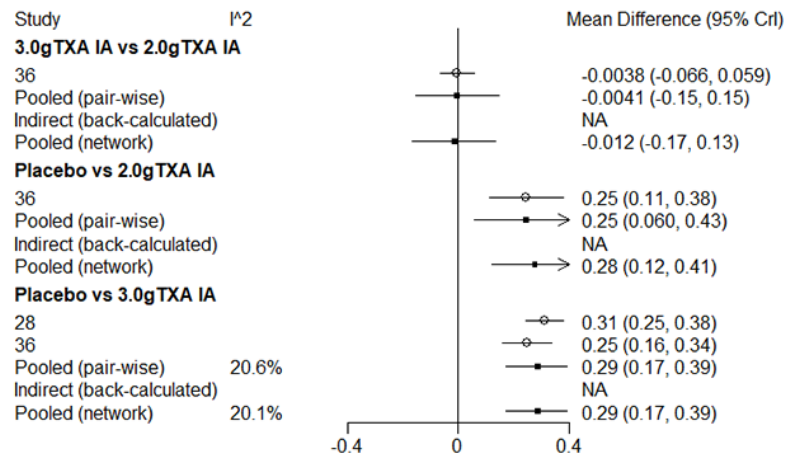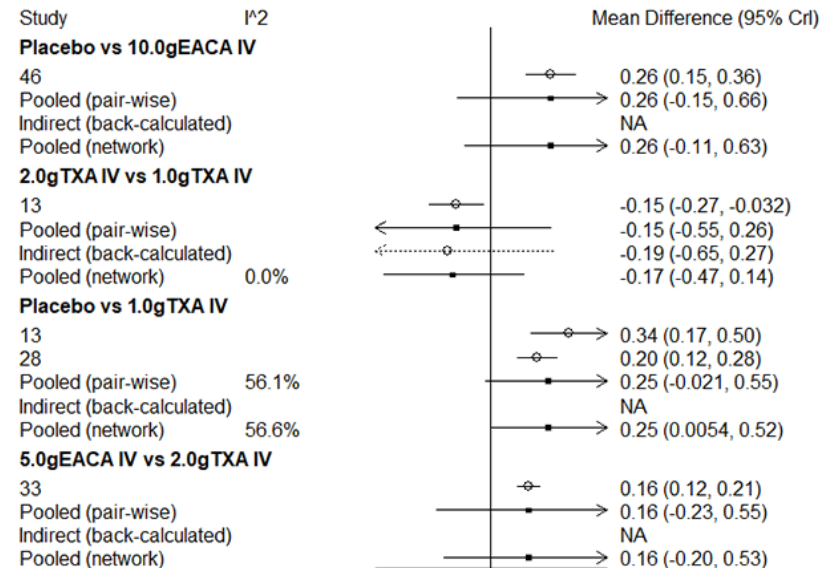

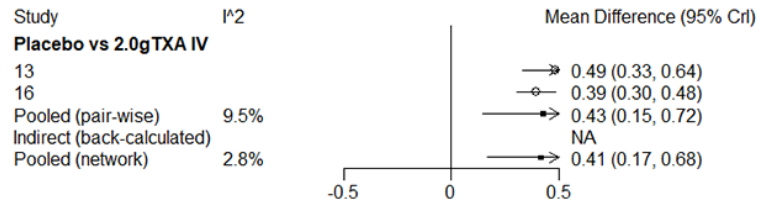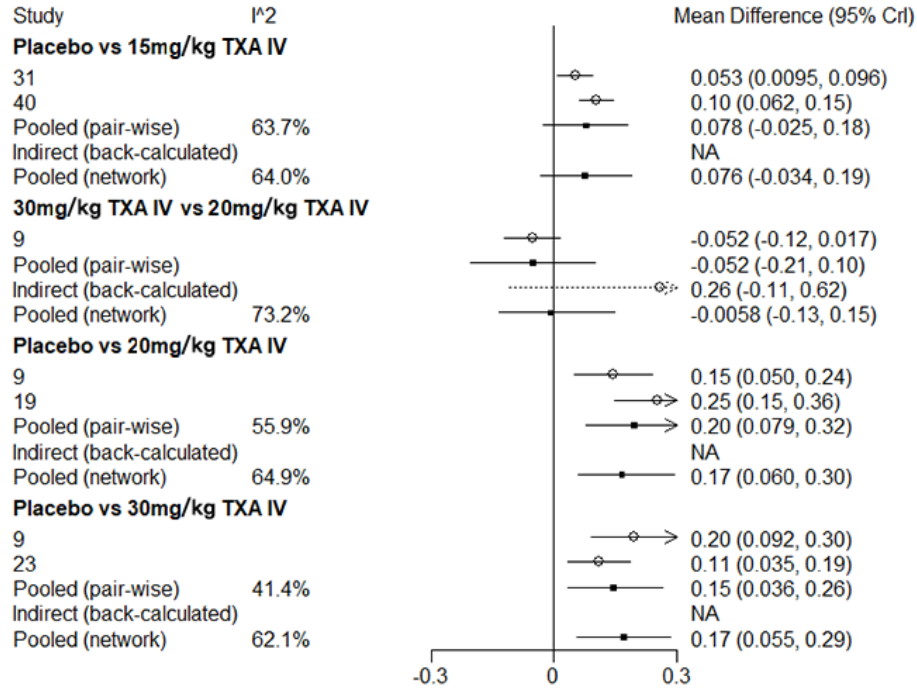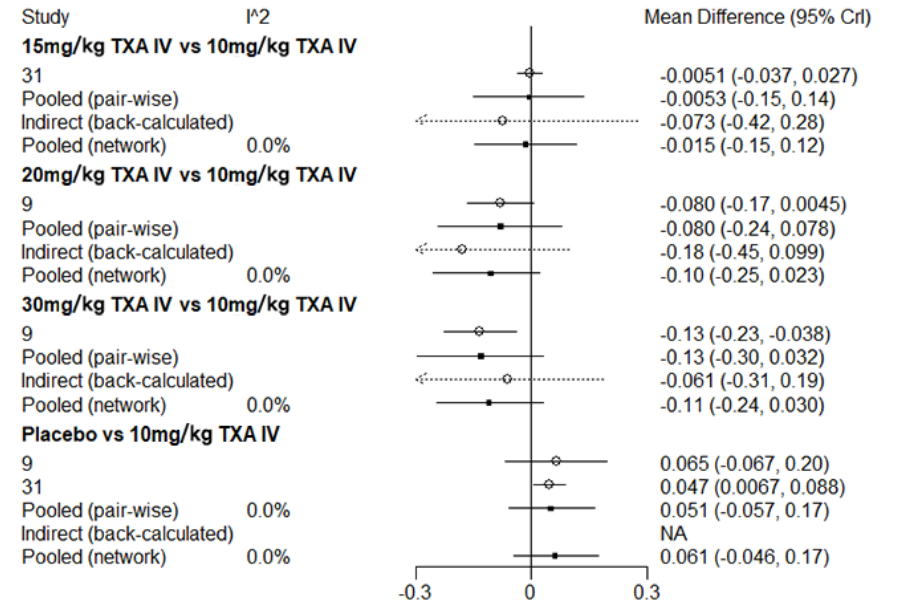

**Supplementary Material 4 (C) e.** Heterogeneity for PE/DVT rates after TKA in intra-articular and intravenous (g or mg/kg) administrations of TXA and EACA.



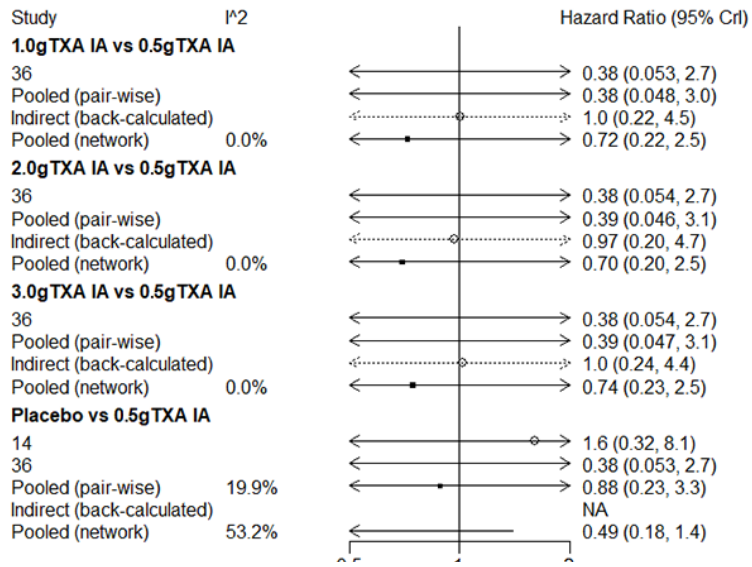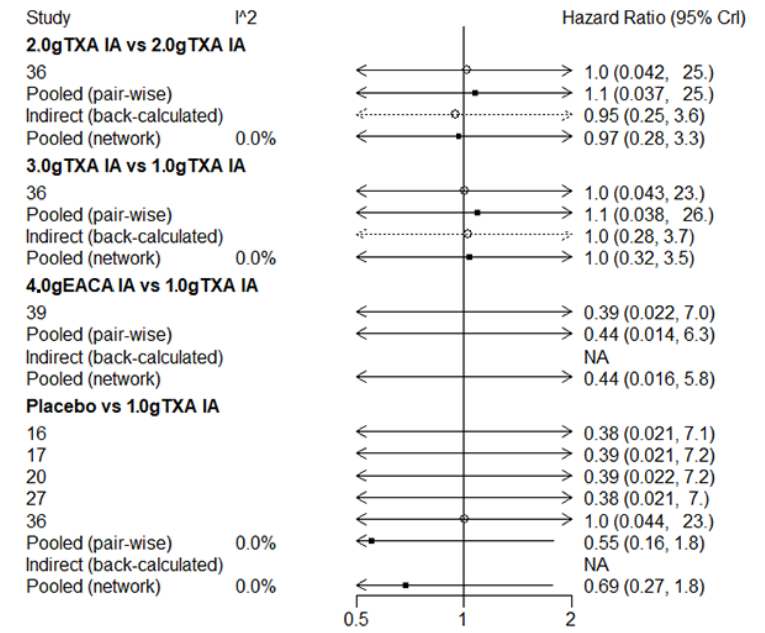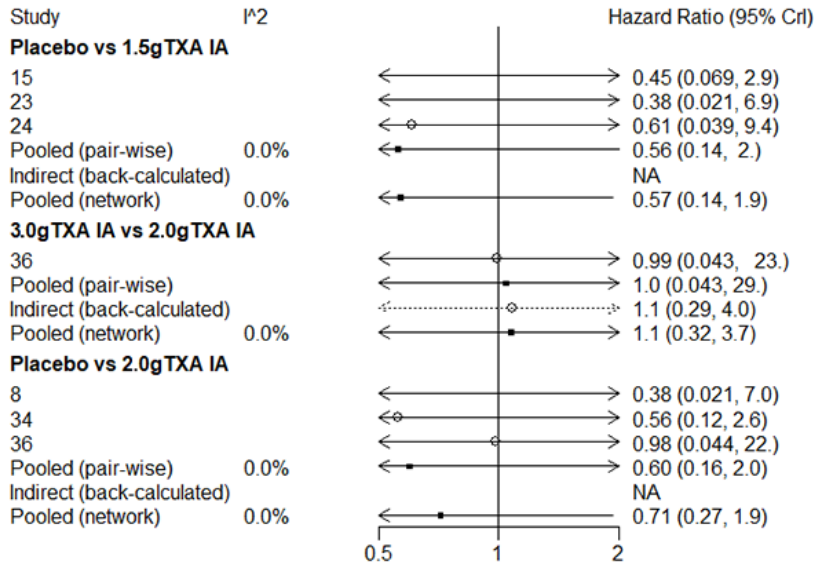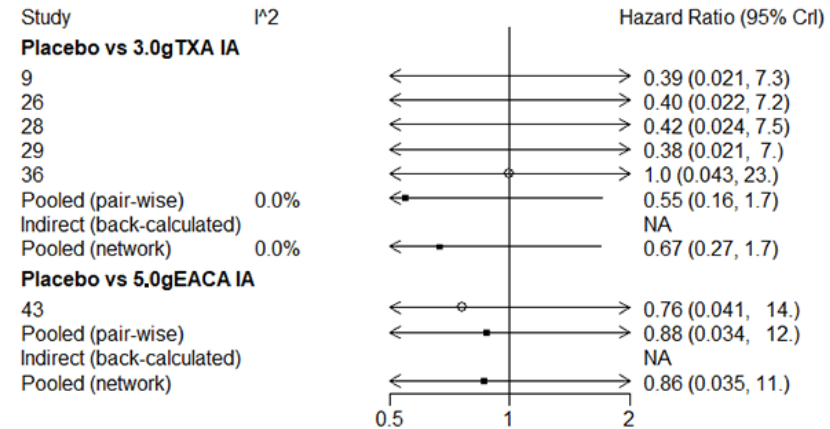

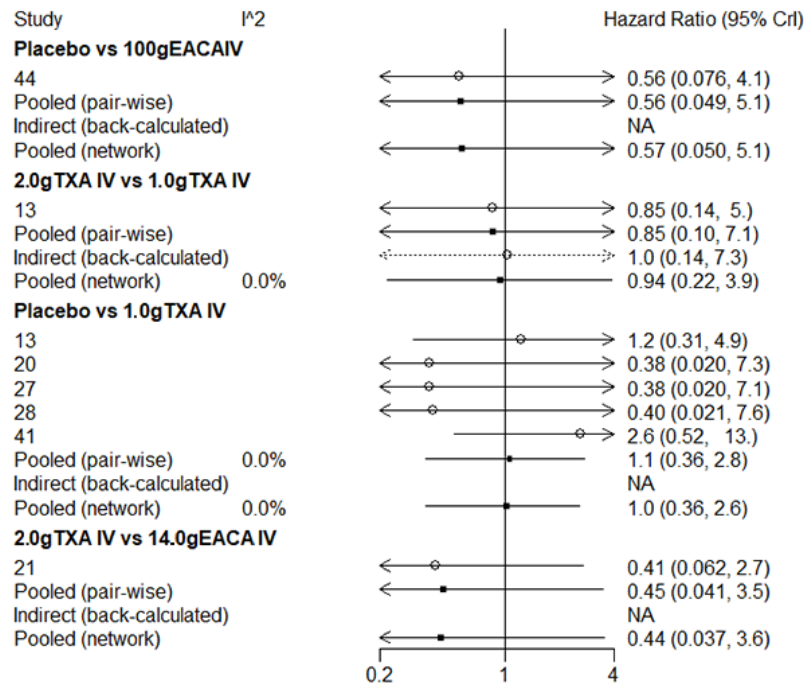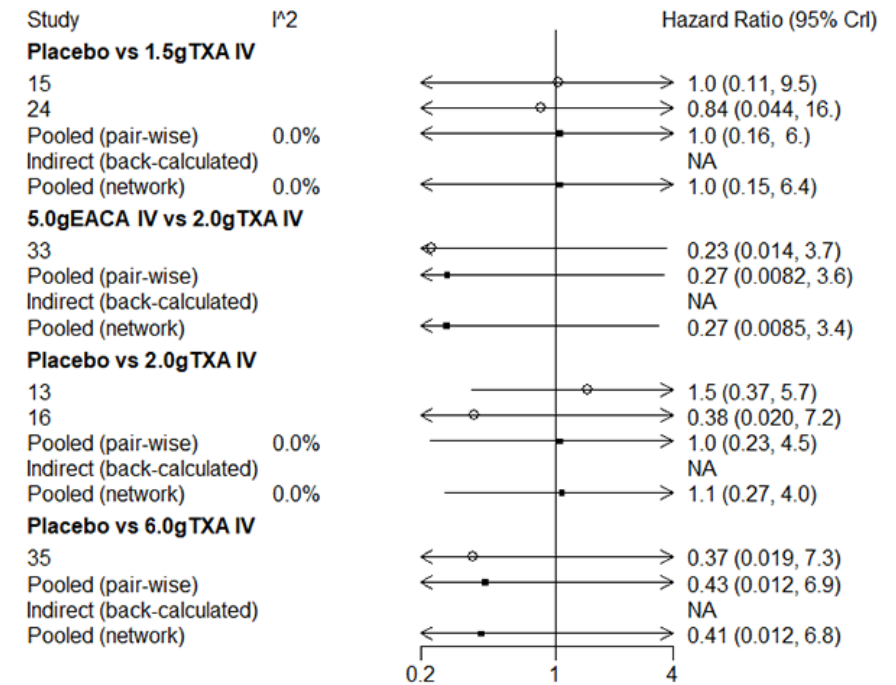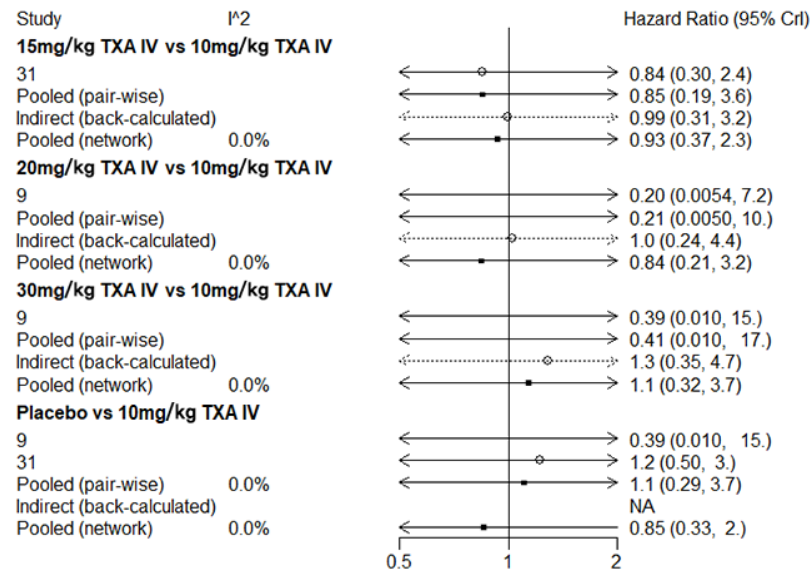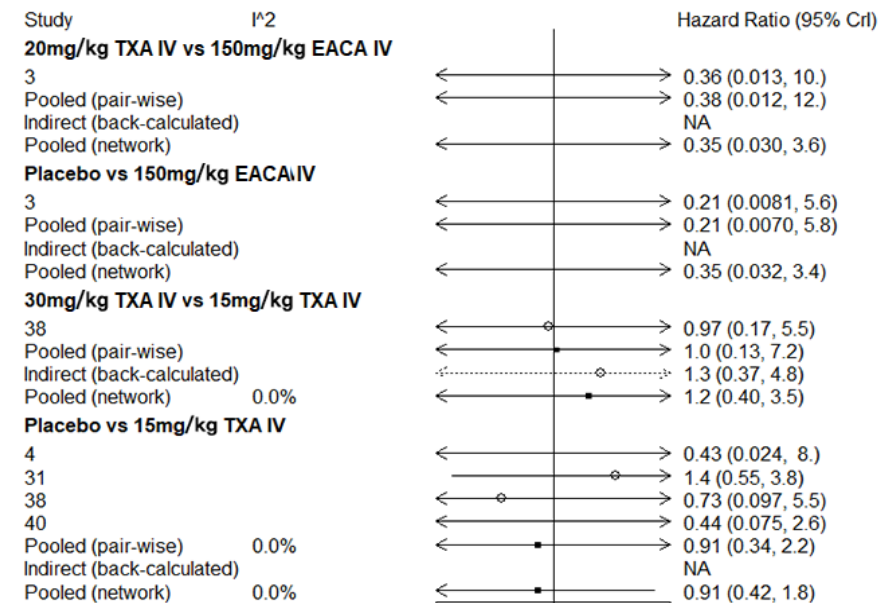

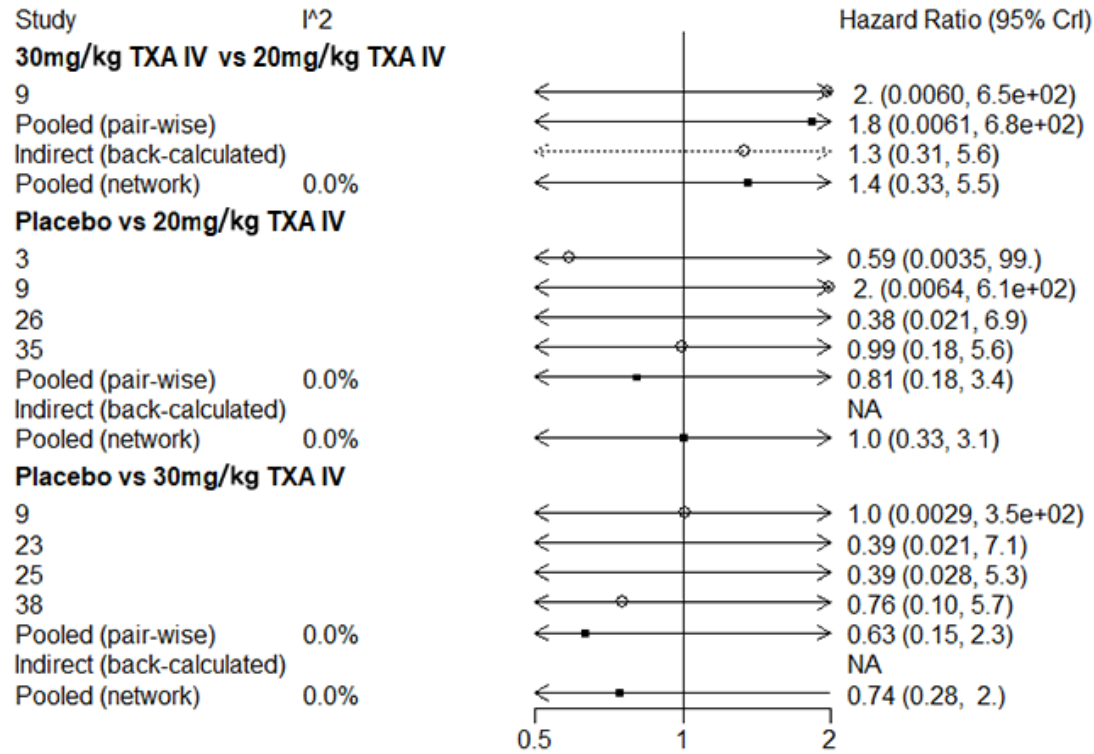

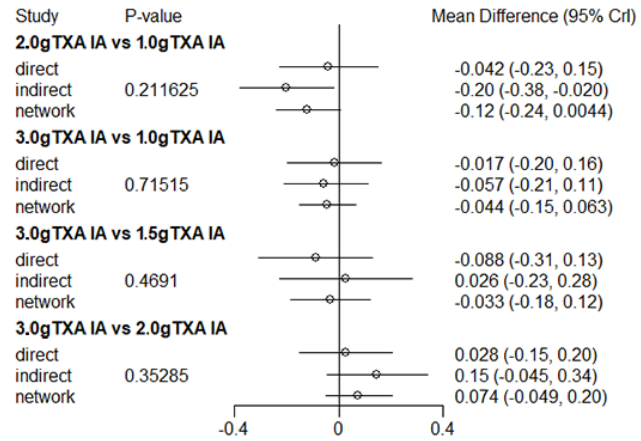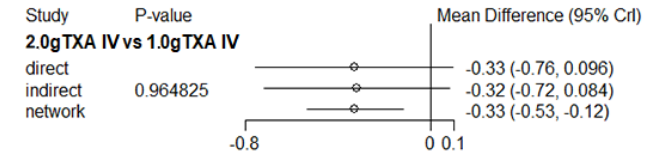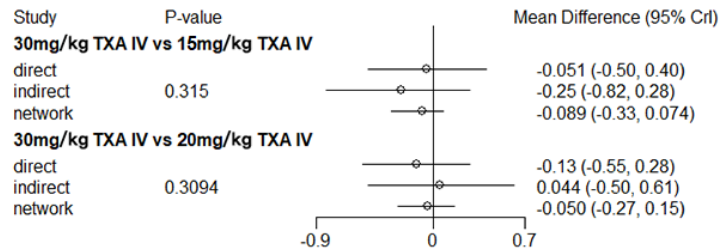

**Supplementary Material 4 (D) a.** Node-Splitting Method for total blood loss after TKA in intra-articular and intravenous (g or mg/kg) administrations of TXA and EACA.

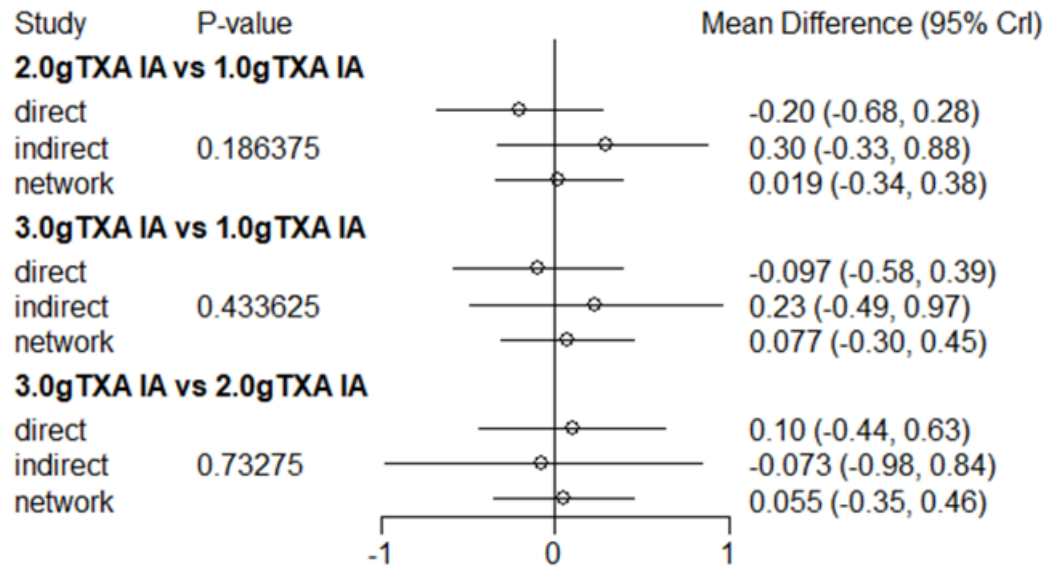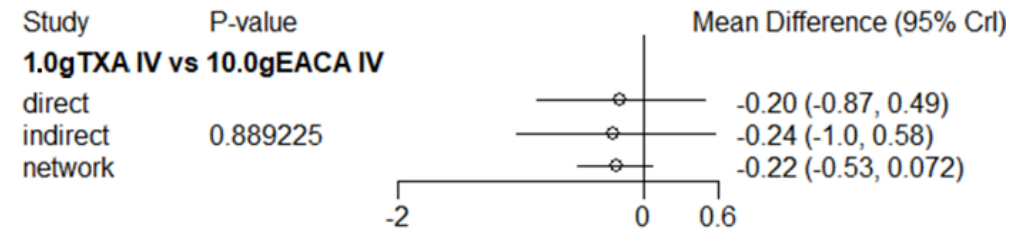

**Supplementary Material 4 (D) b.** Node-Splitting Method for HB drop after TKA in intra-articular and intravenous (g or mg/kg) administrations of TXA and EACA.

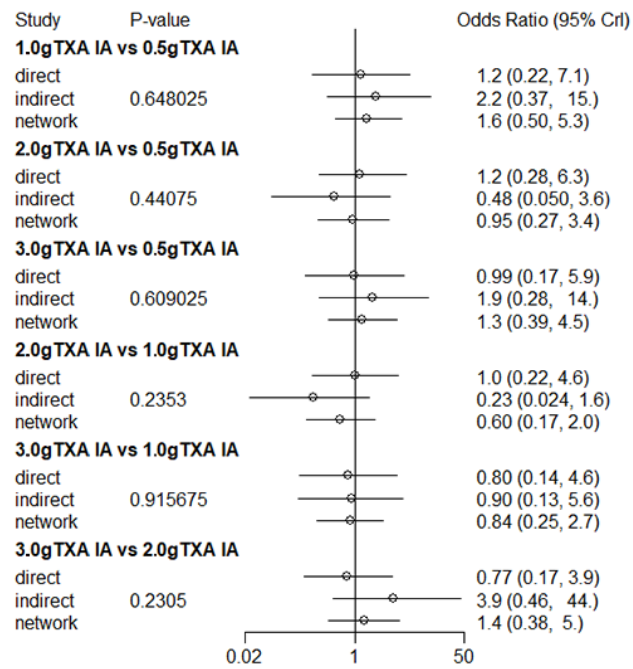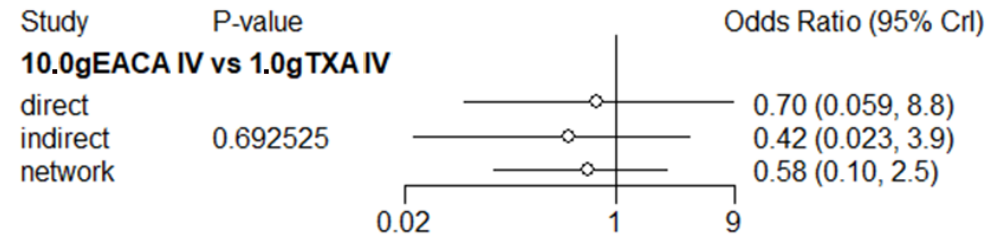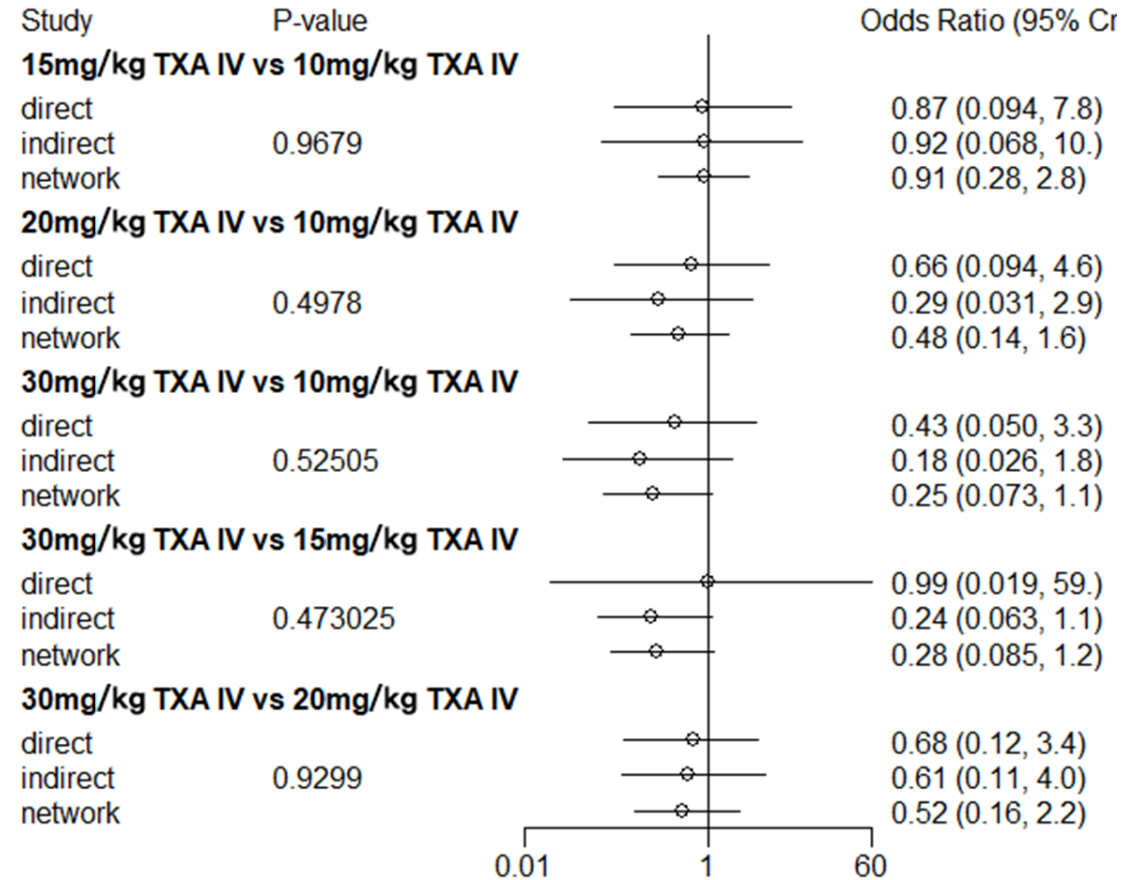

**Supplementary Material 4 (D) c.** Node-Splitting Method for transfusion rates after TKA in intra-articular and intravenous (g or mg/kg) administrations of TXA and EACA.

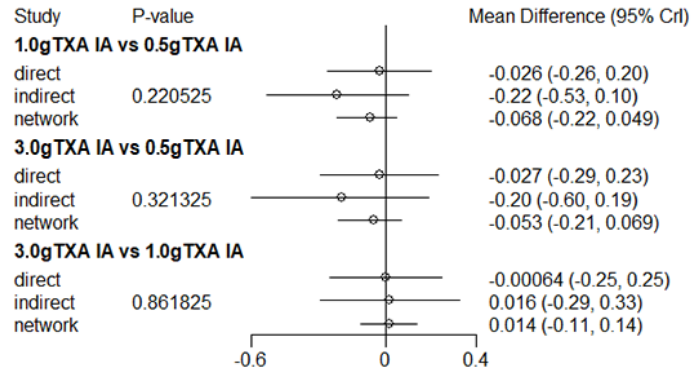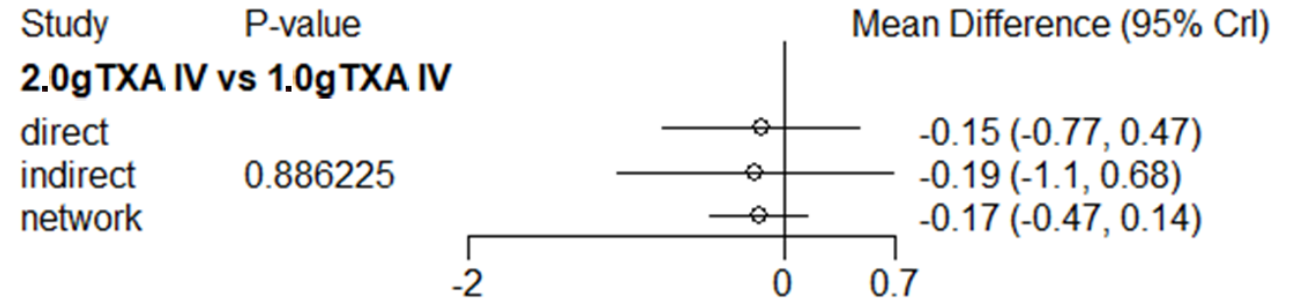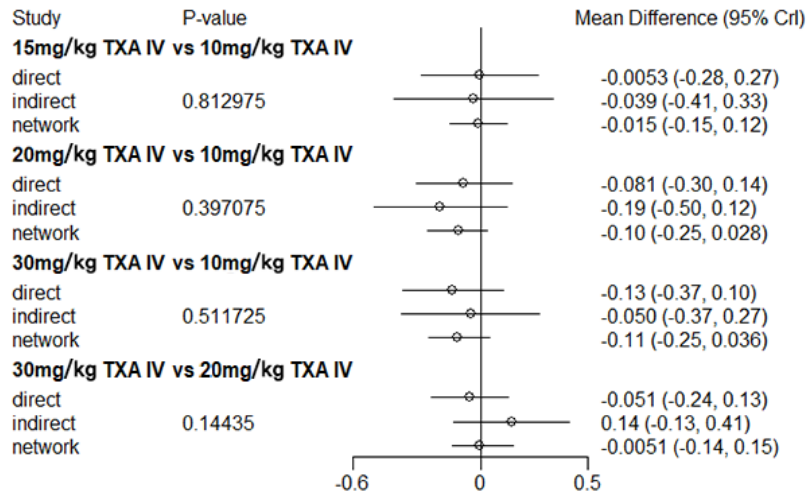

**Supplementary Material 4 (D) d.** Node-Splitting Method for drainage volume after TKA in intra-articular and intravenous (g or mg/kg) administrations of TXA and EACA.

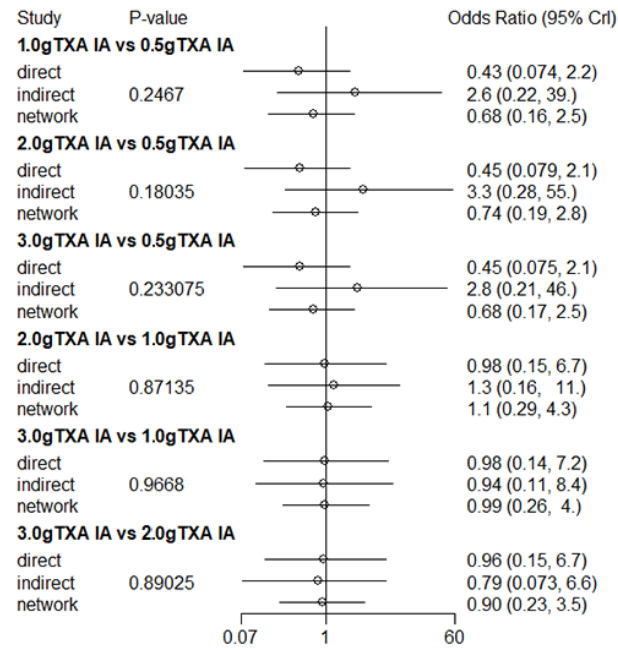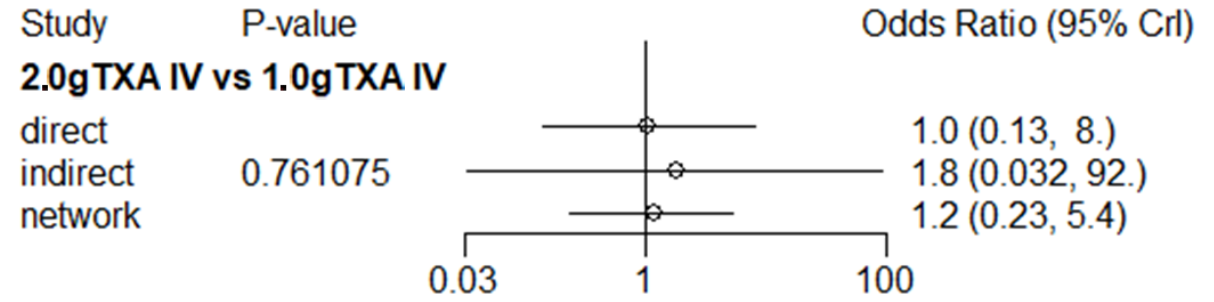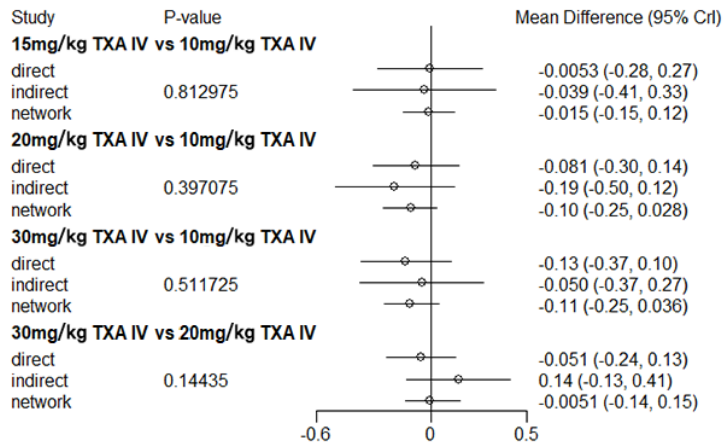

**Supplementary Material 4 (D) e.** Node-Splitting Method for PE/DVT rates after TKA in intra-articular and intravenous (g or mg/kg) administrations of TXA and EACA.
